# Supplementary material for: Acetylcholine deficiency disrupts extratelencephalic projection neurons in the prefrontal cortex in a mouse model of Alzheimer’s disease
Source: PubMed Central journal article supplement (PMC8863829; doi:10.1038/s41467-022-28493-4), 2022-02-22
Supplement: 41467_2022_28493_MOESM1_ESM.pdf [file 41467_2022_28493_MOESM1_ESM.pdf]

## 1 Supplementary materials

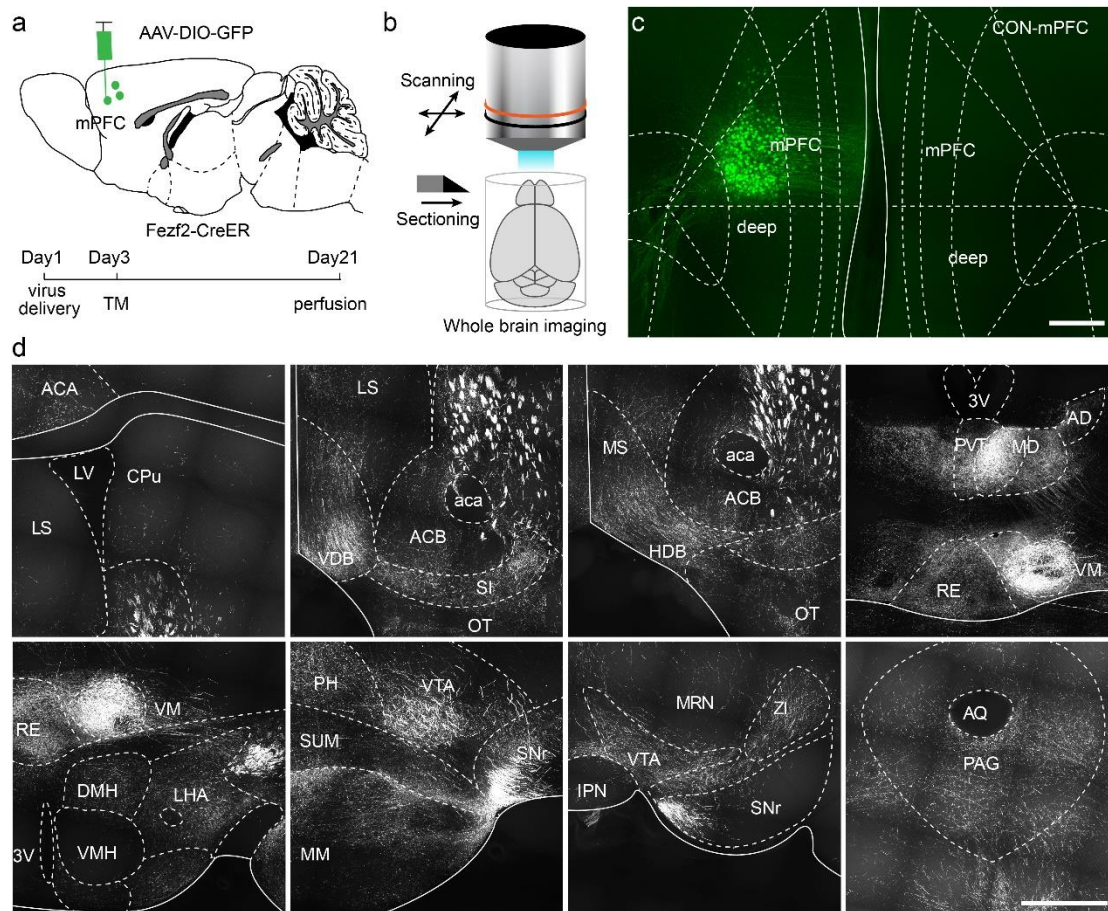

2  
3 Supplementary figure 1 The output of extratelencephalic projection neurons in the mPFC,  
4 related to Fig 1. a. Labeling the Fezf2 positive extratelencephalic projection neurons in mPFC  
5 with AAV virus expressing GFP. b. The whole brain imaging process to acquire the output of  
6 Fezf2 positive neurons in mPFC. c. The virus injection site at mPFC. The infected neurons were  
7 mainly found in deep layers of mPFC, indicating the specificity of the virus labeling. d. The  
8 axon terminals of Fezf2 positive neurons in mPFC in multiple subcortical areas. Scale bar in c  
9 is 200  $\mu$ m. Scale bar in d is 500  $\mu$ m. TM, tamoxifen; mPFC, medial prefrontal cortex; ACA,  
10 anterior cingulate area; LV, lateral ventricle; LS, lateral septum; CPu, caudate putamen; ACB,  
11 nucleus accumbens; VDB, vertical diagonal band; SI, substantia innominata; OT, olfactory  
12 tubercle; MS, medial septum; aca, anterior commissure, anterior part; 3V, third ventricle; PVT,  
13 paraventricular thalamic nucleus; MD, mediodorsal thalamic nucleus; AD, anterodorsal  
14 thalamic nucleus; RE, reuniens thalamic nucleus; VM, ventromedial thalamic nucleus; DMH,  
15 dorsomedial hypothalamic nucleus; VMH, ventromedial hypothalamic nucleus; LHA, lateral  
16 hypothalamic area; PH, posterior hypothalamic area; SUM, supramammillary nucleus; VTA, ventral  
17 tegmental area; SNr, substantia nigra, reticular part; MM, medial mammillary nucleus; IPN,  
18 interpeduncular nucleus; ZI, zona incerta; MRN, midbrain reticular nucleus; PAG, periaqueductal  
19 gray; AQ, aqueduct.

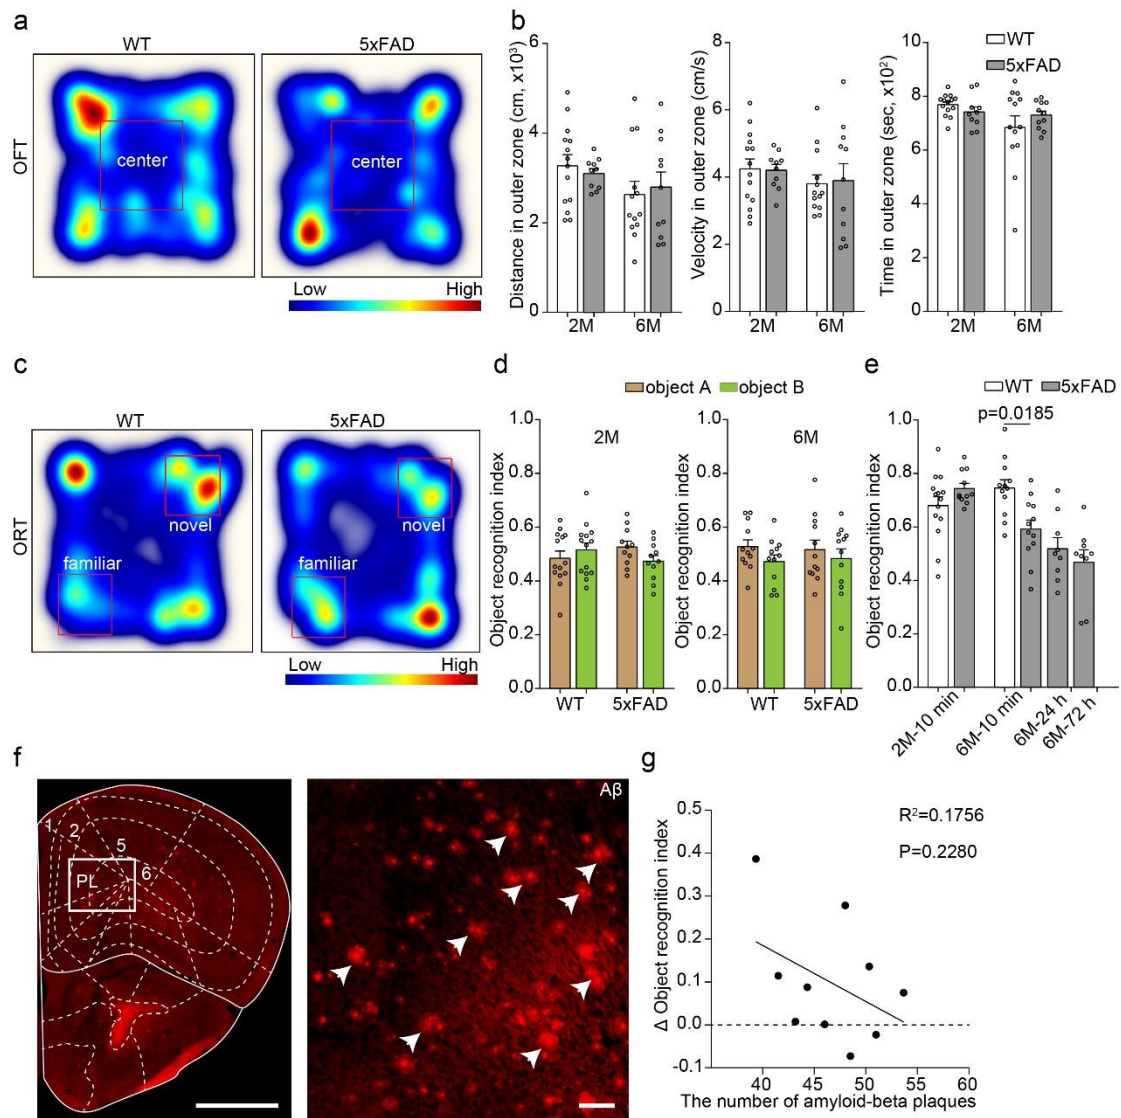

20

21 Supplementary figure 2. Recognition memory was impaired in AD mice, related to Fig 1. a. the  
 22 locomotor activity was assessed in an open-field test. Heat-map plots showed the time that mice  
 23 spent in outer zone during the test. Red = more time, blue = less time. b. there was no statistical  
 24 difference in total distance traveled, time spent and velocity for 5×FAD compared to their wild-  
 25 type littermates at 2 months and 6 months of age in outer of the arena. (2M, n = 14 animals for  
 26 WT, n = 10 animals for AD; 6M, n = 13 animals for WT, n = 11 animals for AD). c. Heat-map  
 27 plots showed object recognition memory measures from the object recognition test. Red = more  
 28 time, blue = less time. d. There was no statistical difference in time spent to explore one of the  
 29 objects during the training session for 5×FAD compared to their wild-type littermates at 2  
 30 months and 6 months of age, respectively. (2M, n = 14 animals for WT, n = 11 animals for AD;  
 31 6M, n = 12 animals for WT, n = 12 animals for AD) e. During the test session, the 5×FAD mice  
 32 significantly spent less time exploring the novel object compared with the wild-type littermates  
 33 at 6 months of age. With longer delay time, the 5×FAD animals showed worse performance  
 34 during the object recognition test. (one-way repeated-measures (RM) ANOVA with Tukey's  
 35 post hoc test, 2M, n = 14 animals for WT, n = 11 animals for AD; 6M, 10min delay, n = 12  
 36 animals for WT, n = 12 animals for AD; 6M, 24h and 72h delay, n=9 animals for AD). f.

---

37 Representative images showed the A $\beta$  plaques accumulation in the mPFC. g. The correlation  
38 between delta recognition index and the density of A $\beta$  plaques in the mPFC of 5 $\times$ FAD mice at  
39 6 months of age. n=10 animals. Linear regression analysis. Scale bar in the f(left) is 1mm;  
40 scale bar in the f(right) is 100  $\mu$ m. All data are listed as the Mean  $\pm$  SEM.  
41

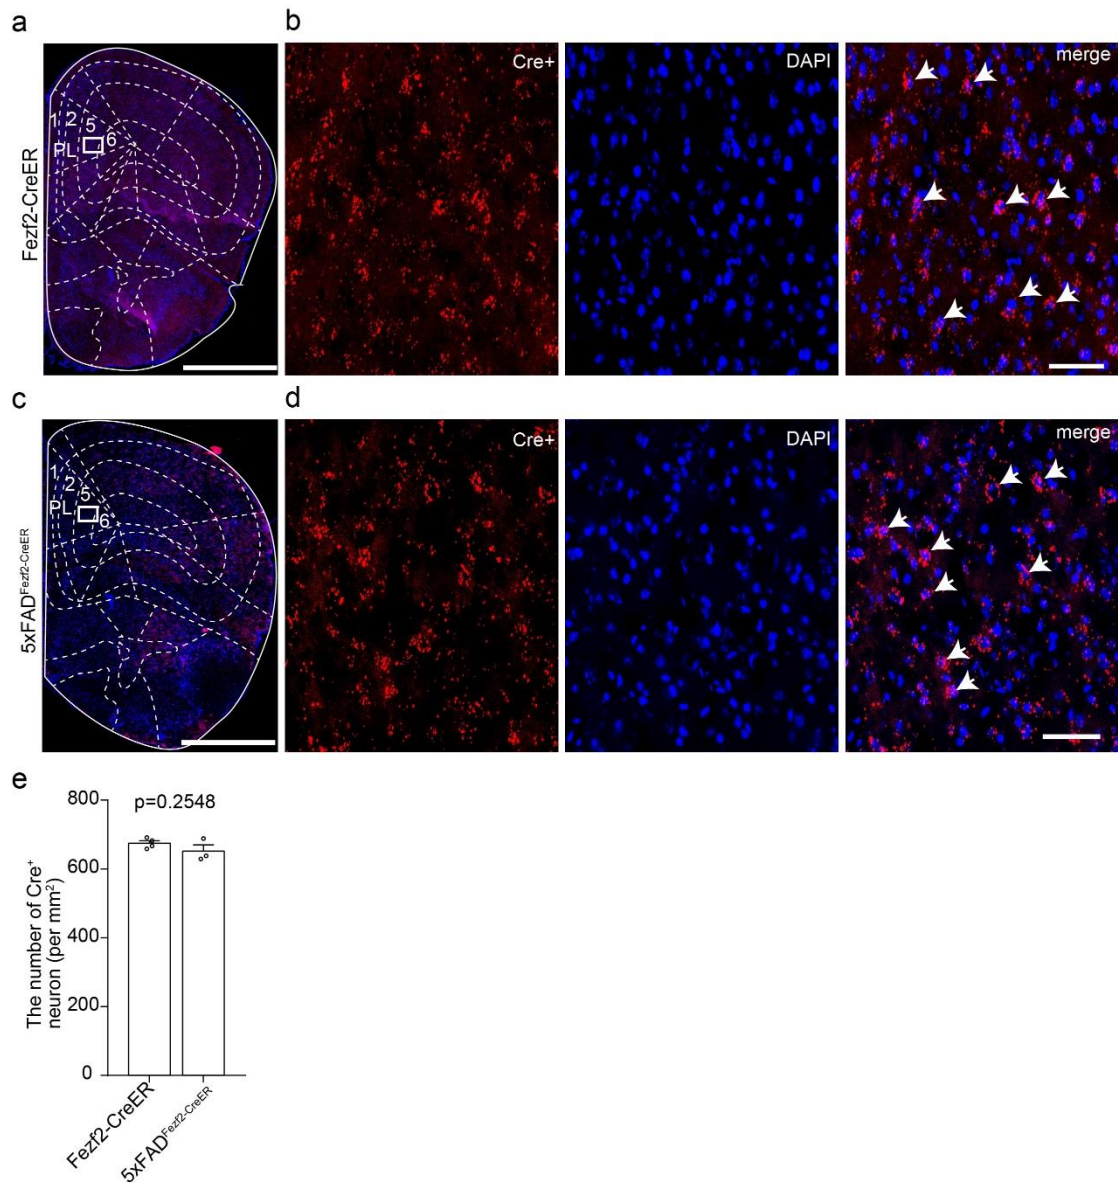

43

44 Supplementary figure 3 Crossing the 5×FAD animals with Fezf2-CreER animals did not alter  
 45 the number of Cre positive cells in the mPFC. a-d. Fluorescent in situ hybridization against Cre  
 46 showed the Cre expression in the mPFC of Fezf2-CreER animals and the 5×FAD<sub>Fezf2-CreER</sub>  
 47 hybrid animals. e. Quantification of Cre positive cells in the mPFC of Fezf2-CreER animals  
 48 and the 5×FAD<sub>Fezf2-CreER</sub> hybrid animals. Fezf2-CreER, n=4 animals; 5×FAD<sub>Fezf2-CreER</sub>, n=3  
 49 animals, two-tailed unpaired t test. Scale bars in the a and c are 1mm; scale bars in the b and d  
 50 are 100 μm. All data are listed as the Mean ± SEM.

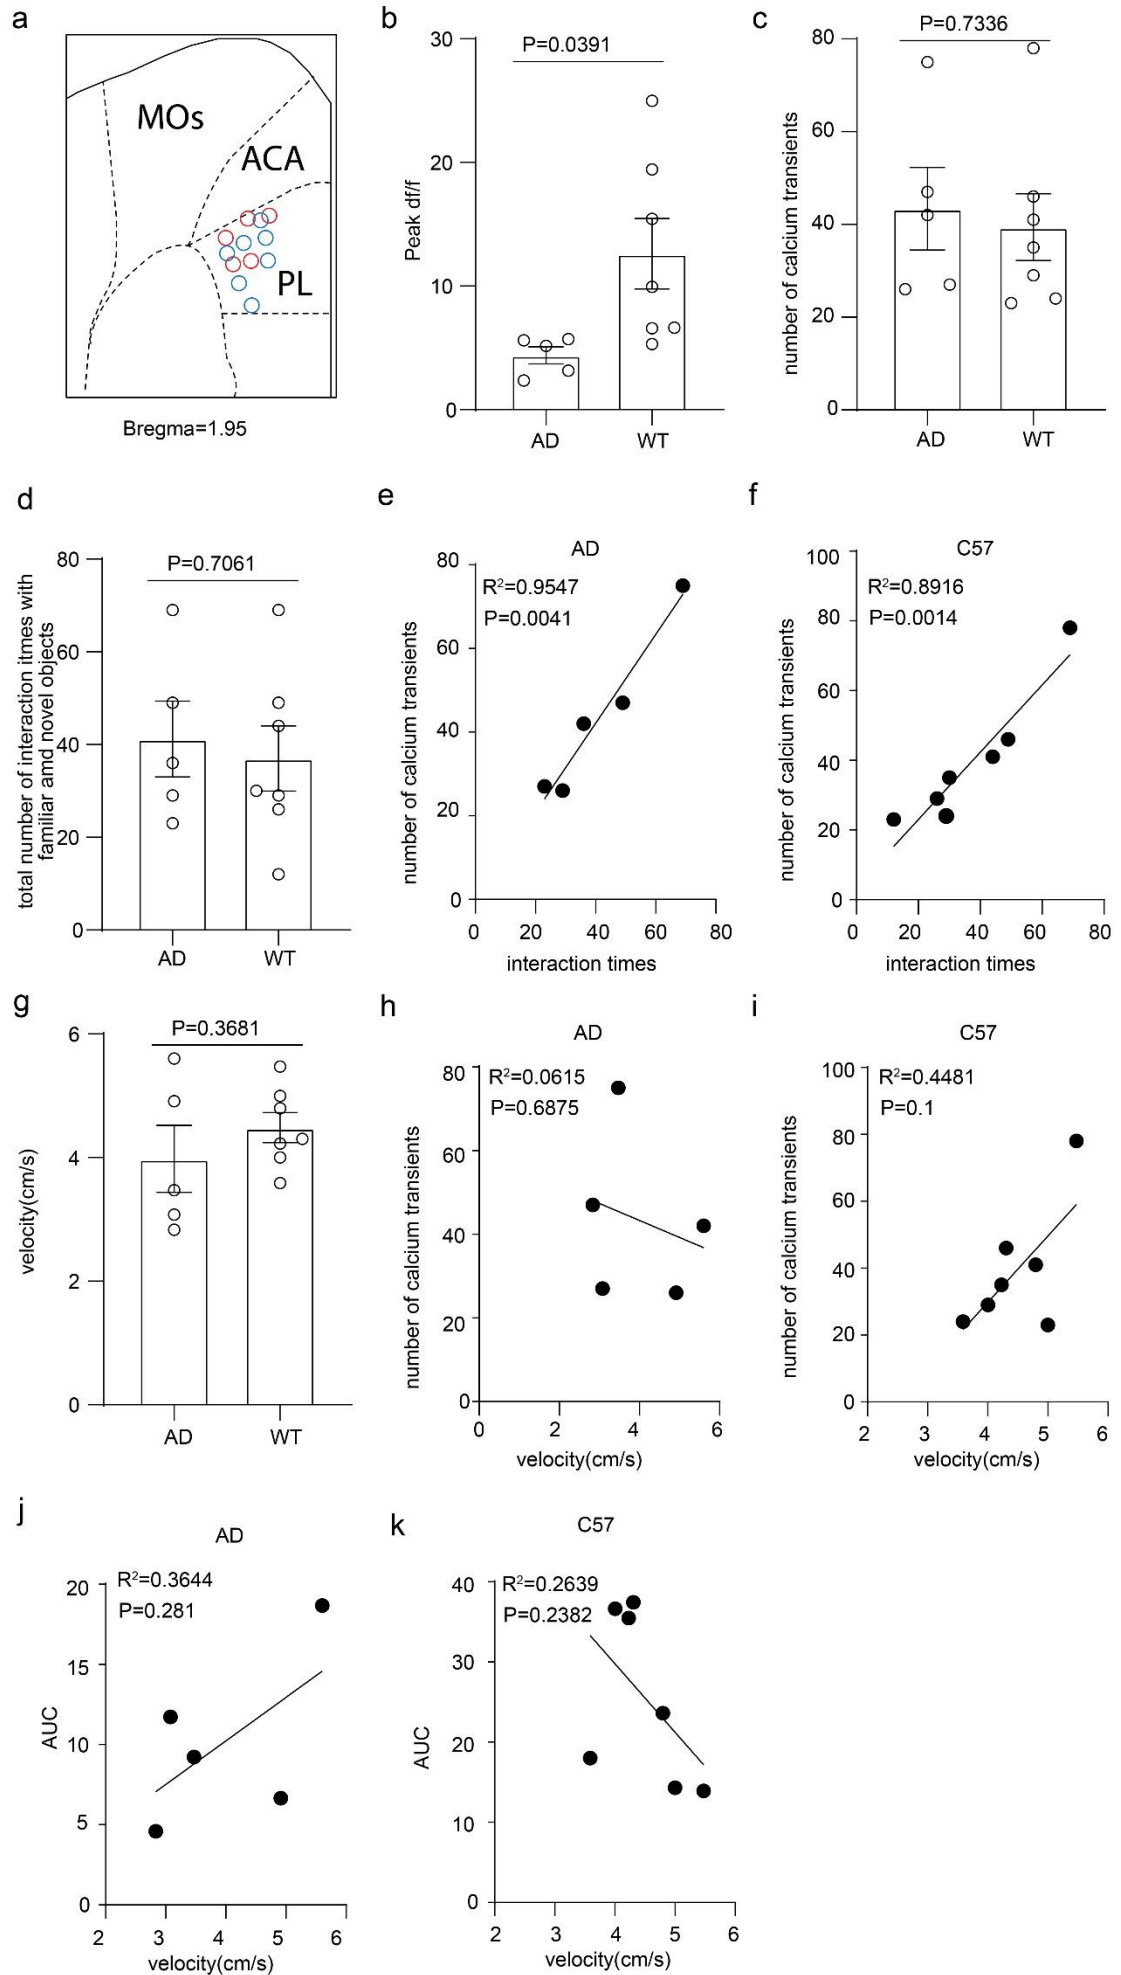

---

52 Supplementary figure 4 The properties of the fiber photometry data from the ET neurons of  
53 Fezf2-CreER animals and the AD<sub>Fezf2-CreER</sub> animals. a. Schematics showing the placement of optic  
54 fibers in Fig 1. The red circles represent the placement of optic fibers in the PL of AD<sub>Fezf2-CreER</sub>  
55 mice. The blue circles represent the placement of optic fibers in the PL of Fezf2-CreER mice.  
56 b. The quantification of peak  $\Delta F/F$  of average plots of calcium response from different animals.  
57 c. The quantification of the number of calcium transients during the photometry recording of  
58 different animals. d. The total number of interaction times with familiar and novel objects of  
59 the animals during the object recognition test. e, f. The correlation between object interaction  
60 times and the number of calcium transients in Fezf2-CreER animals and the AD<sub>Fezf2-CreER</sub>  
61 animals. g. The average velocity of the animals in object recognition test. h, i. The correlation between  
62 velocity and the number of calcium transients in Fezf2-CreER animals and the AD<sub>Fezf2-CreER</sub>  
63 animals. j, k. The correlation between velocity and the AUC in Fezf2-CreER animals and the  
64 AD<sub>Fezf2-CreER</sub> animals. Two-tailed unpaired t test, Fezf2-CreER, n=7 animals. AD<sub>Fezf2-CreER</sub> animals, n=5  
65 animals. MOs, secondary motor area; ACA, anterior cingulate area; PL, prelimbic area.  
66 All data are listed as the Mean  $\pm$  SEM.  
67  
68

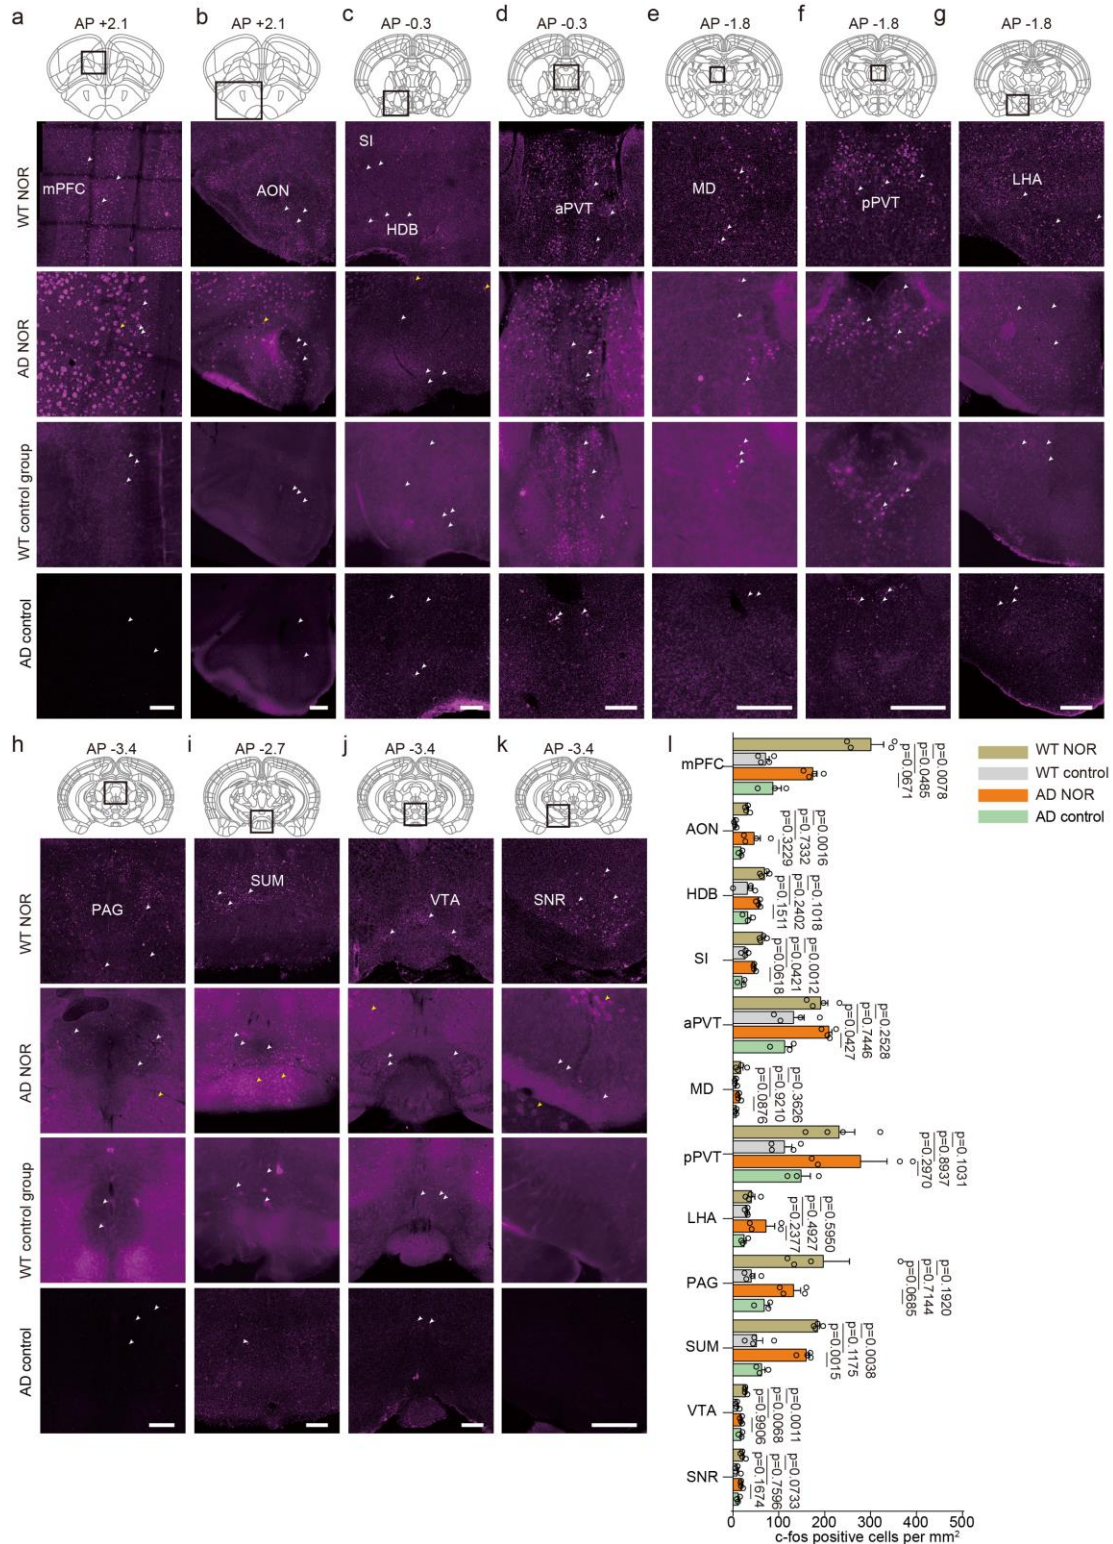

69

70 Supplementary figure 5 The altered neuronal activity activated by object exploration in  
 71 downstream brain areas of extralencephalic projection neurons in the mPFC of 5×FAD mice,  
 72 related to Fig 1. a-k. Example c-fos immunostaining in downstream brain areas of  
 73 extralencephalic projection neurons in the mPFC of wild type mice or 5×FAD mice before  
 74 and after object exploration. l. Counts of c-fos+ cells in different brain areas after object  
 75 exploration. Two-way repeated-measures (RM) ANOVA with Tukey's post hoc test, n = 4

---

76 animals for WT object recognition test group, WT control group and AD object recognition test  
77 group. n=3 animals for AD control group. Scale bars in a-k are 100  $\mu$ m. mPFC, medial  
78 prefrontal cortex; AON, anterior olfactory nucleus; HDB, horizontal diagonal band; SI,  
79 substantia innominata; aPVT, anterior paraventricular thalamic nucleus; MD, mediodorsal  
80 thalamic nucleus; pPVT, posterior paraventricular thalamic nucleus; LHA, lateral hypothalamic  
81 area; PAG, periaqueductal gray; SUM, supramammillary nucleus; VTA, ventral tegmental area;  
82 SNR, substantia nigra, reticular part. All data are listed as the Mean  $\pm$  SEM.  
83



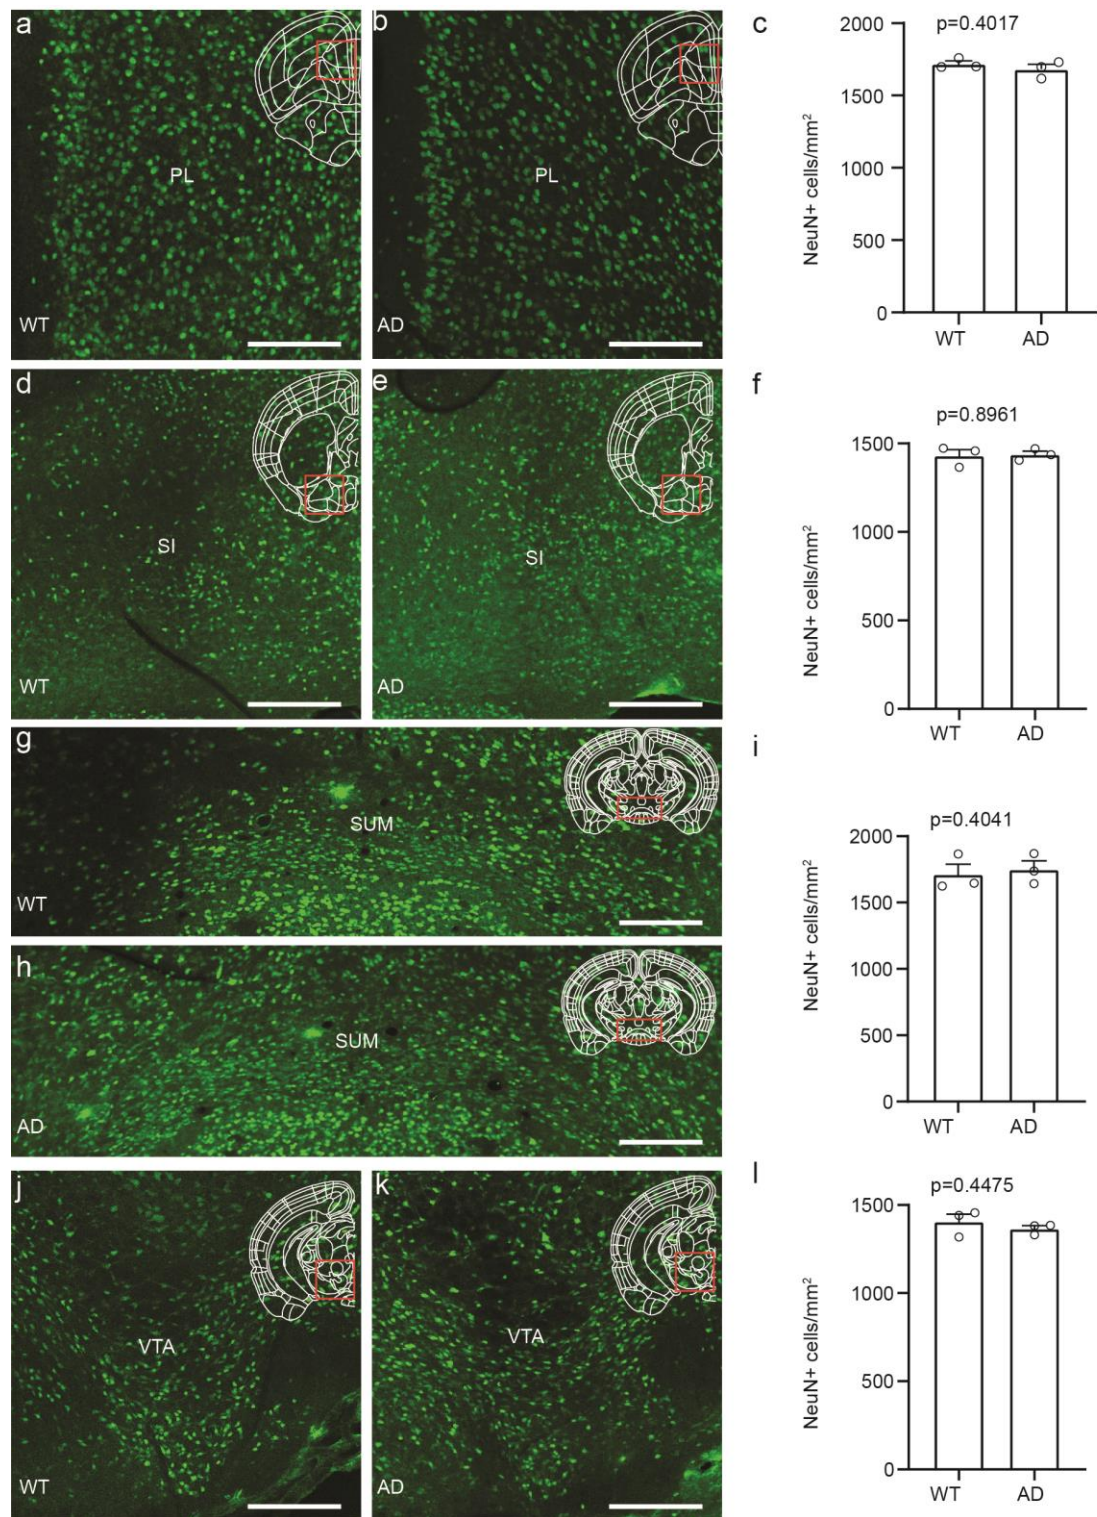

84

85 Supplementary figure 6 The NeuN density in the mPFC, SI, SUM AND VTA of WT animals  
 86 and 5×FAD animals. a-c. The NeuN density showed no difference in the mPFC between WT  
 87 animals and 5×FAD animals. d-f. The NeuN density showed no difference in the SI between  
 88 WT animals and 5×FAD animals. g-i. The NeuN density showed no difference in the SUM  
 89 between WT animals and 5×FAD animals. j-l. The NeuN density showed no difference in the  
 90 VTA between WT animals and 5×FAD animals. Two-tailed unpaired t test, n=3 animals. Scale

---

91 bars are 200  $\mu\text{m}$ . mPFC, medial prefrontal cortex; SI, substantia innominata; SUM,  
92 supramammillary nucleus; VTA, ventral tegmental area. All data are listed as the Mean  $\pm$  SEM.

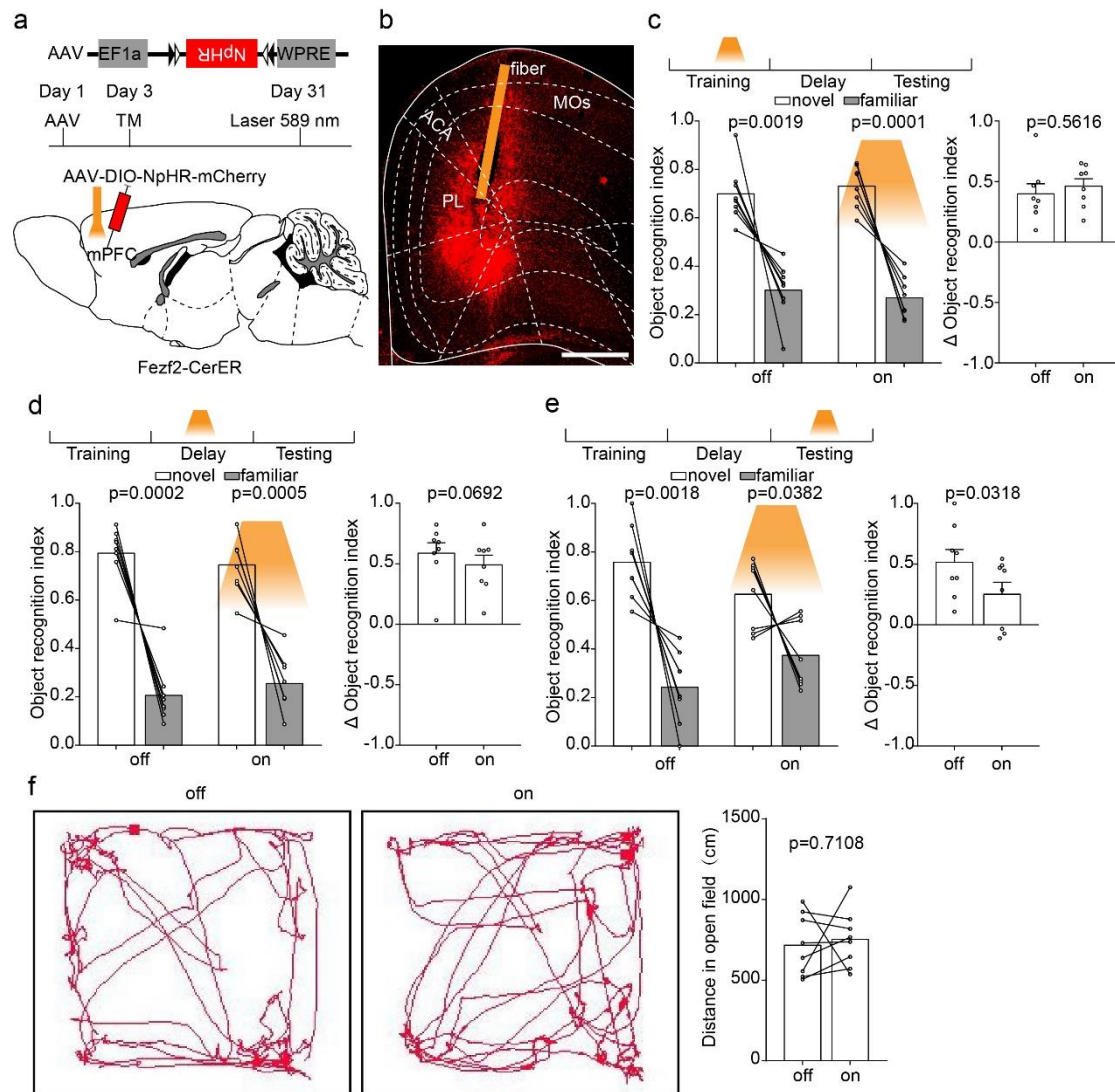

93

94 Supplementary figure 7 Inhibition of extralencephalic projection neurons in the mPFC of wild  
 95 type mice in specific phase disrupted object recognition memory expression, related to Fig 2.  
 96 a. The experimental strategy of inhibition of extralencephalic projection neurons in the mPFC.  
 97 The Cre dependent AAV expressing NpHR was injected into the mPFC of Fezf2-CreER mice.  
 98 Three days after the virus injection, tamoxifen (200mg/kg) was injected intraperitoneally to  
 99 activate the expression of NpHR. 3-4 weeks after the virus injection, the behavior tests were  
 100 performed. b. An example of position of optical fiber for inhibition of the extralencephalic  
 101 projection neurons in the mPFC. c. Statistical plots showed that the Fezf2-CreER mice tended  
 102 to explore the novel object under two conditions (with or without light stimulation during  
 103 training session, two-tailed paired t test). The delta object cognition index showed no difference  
 104 under two conditions (two-tailed paired t test). n = 8 animals. d. Statistical plots showed that  
 105 the Fezf2-CreER mice tended to explore the novel object under two conditions (with or without  
 106 light stimulation during delay session, two-tailed paired t test). The delta object cognition  
 107 index showed no difference under two conditions (two-tailed paired t test). n = 8 animals. e. Statistical  
 108 plots showed that during the test session, the Fezf2-CreER mice that received light stimulation  
 109 significantly spent less time exploring the novel object compared to the sessions without light

---

110 stimulation at 6 months of age, two-tailed paired t test. The animals which received light  
111 stimulation during test session showed decreased delta object recognition index, two-tailed  
112 paired t test, n = 8 animals. f. Inhibition of extratelencephalic projection neurons in the mPFC  
113 did not affect the locomotion of the animals. f(left), the representative traces of the animals  
114 during the open field test with or without light inhibition. f(right), the quantification of the  
115 traveling distance of the animals with or without light inhibition. two-tailed paired t test, n=8  
116 animals. Scale bar in b is 500  $\mu$ m. TM, tamoxifen; MOs, secondary motor area; ACA, anterior  
117 cingulate area; PL, prelimbic area. All data are listed as the Mean  $\pm$  SEM.

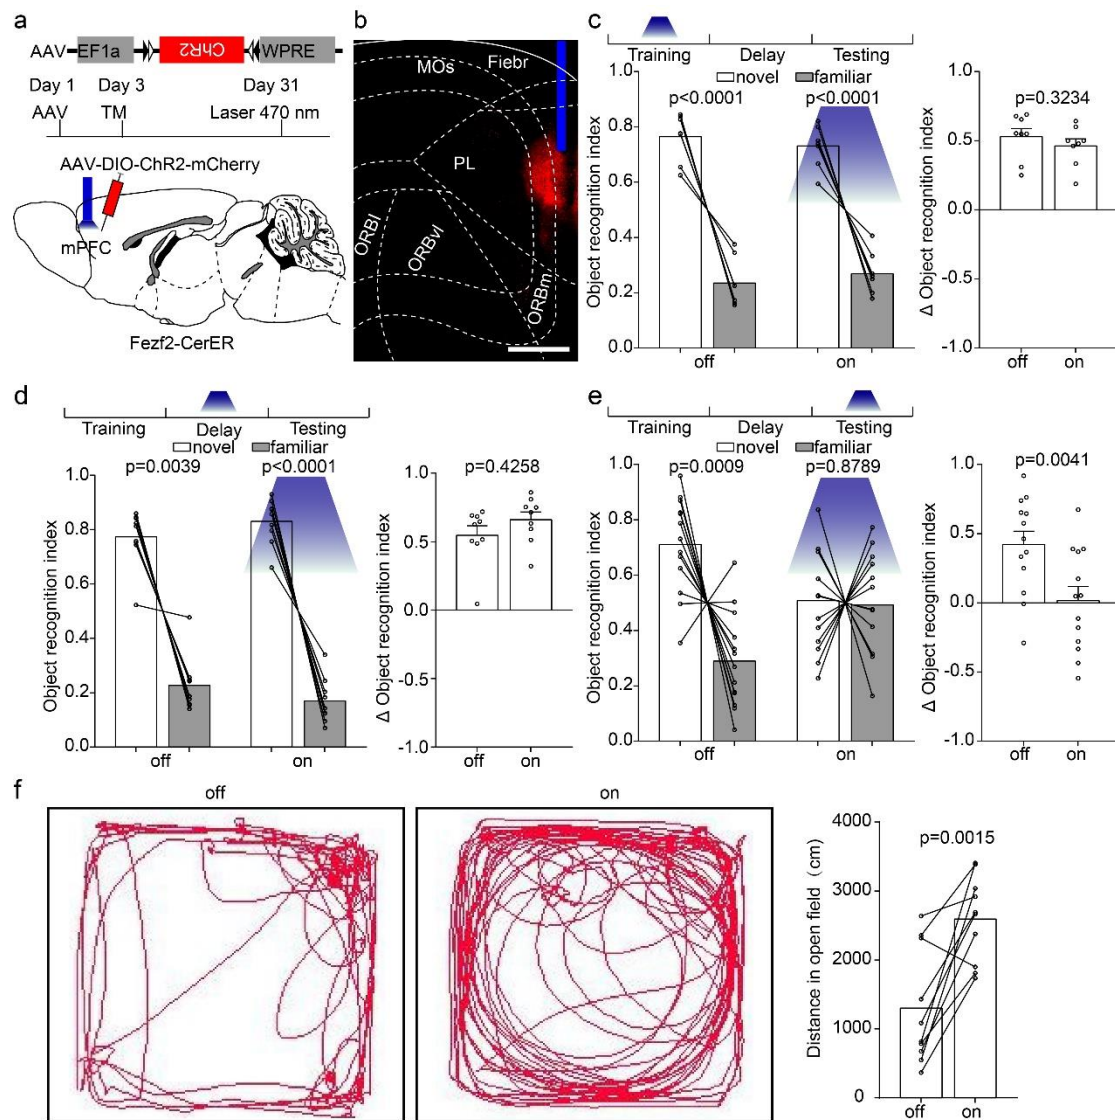

118

119 Supplementary figure 8 Activation of extratelencephalic projection neurons in the mPFC of  
 120 Fezf2-CreER mice in specific phase disrupted object recognition memory expression, related  
 121 to Fig 2. a. The experimental strategy of activation of extratelencephalic projection neurons in  
 122 the mPFC. The Cre dependent AAV expressing ChR2 was injected into the mPFC of Fezf2-  
 123 CreER mice. Three days after the virus injection, tamoxifen (200mg/kg) was injected  
 124 intraperitoneally to activate the expression of ChR2. 3-4 weeks after the virus injection, the  
 125 behavior tests were performed. b. An example of position of optical fiber for activation of the  
 126 extratelencephalic projection neurons in the mPFC. c. Statistical plots showed that the Fezf2-  
 127 CreER mice tended to explore the novel object under two conditions (with or without light  
 128 stimulation during training session, two-tailed paired t test, off,  $p=0.000041$ ; on,  $p=0.000041$ ).  
 129 The delta object cognition index showed no difference under two conditions. two-tailed paired  
 130 t test,  $n = 8$  animals. d. Statistical plots showed that the Fezf2-CreER mice tended to explore  
 131 the novel object under two conditions (with or without light stimulation during delay session,  
 132 left, two-tailed Wilcoxon matched-pairs signed rank test; right, two-tailed paired t test,  
 133  $p=2.38 \times 10^{-6}$ ). The delta object cognition index showed no difference under two conditions.  
 134 two-tailed Wilcoxon matched-pairs signed rank test,  $n = 9$  animals. e. Statistical plots showed

---

135 that during the test session, the *Fezf2-CreER* mice that received light stimulation significantly  
136 spent less time exploring the novel object compared to the sessions without light stimulation at  
137 6 months of age (two-tailed paired t test). The animals which received light stimulation during  
138 test session showed decreased delta object recognition index, two-tailed paired t test,  $n = 13$   
139 animals. f. Activation of extratelencephalic projection neurons in the mPFC increased the  
140 locomotion of the animals. f(left), the representative traces of the animals during the open field  
141 test with or without light activation. f(right), the quantification of the traveling distance of the  
142 animals with or without light activation. two-tailed paired t test,  $n=10$  animals. Scale bar in b  
143 is 500  $\mu\text{m}$ . MOs, secondary motor area; PL, prelimbic area; ORBm, medial orbital cortex;  
144 ORBvl, ventrolateral orbital cortex; ORBl, lateral orbital cortex. All data are listed as the Mean  
145  $\pm$  SEM.  
146

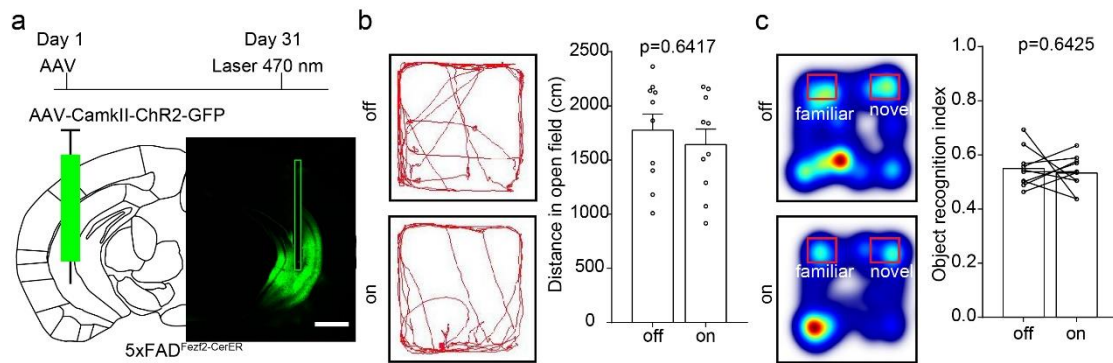

148

149 Supplementary figure 9 Activation of ventral hippocampus of 5×FAD mice did not improve the  
 150 expression of object recognition memory. a. The experiment procedure. The AAV virus  
 151 expressing ChR2 under the control of camkii promotor was bilaterally injected into the ventral  
 152 hippocampus of 5×FAD mice. The behavior test was conducted 1 month after the surgery.  
 153 b(left), the representative traces of the animals during the open field test with or without light  
 154 activation. b(right), the quantification of the traveling distance of the animals with or without  
 155 light activation. two-tailed paired t test, n=10 animals. c(left), Heat-map plots showed object  
 156 recognition memory measures from the object recognition test. Red = more time, blue = less  
 157 time. c(right), quantification of the object recognition index towards novel object with or  
 158 without light activation. Activation of ventral hippocampus of 5×FAD mice did not increase the  
 159 exploration time towards novel object. two-tailed paired t test, n=10 animals. Scale bar in a is  
 160 1mm. All data are listed as the Mean ± SEM.

161

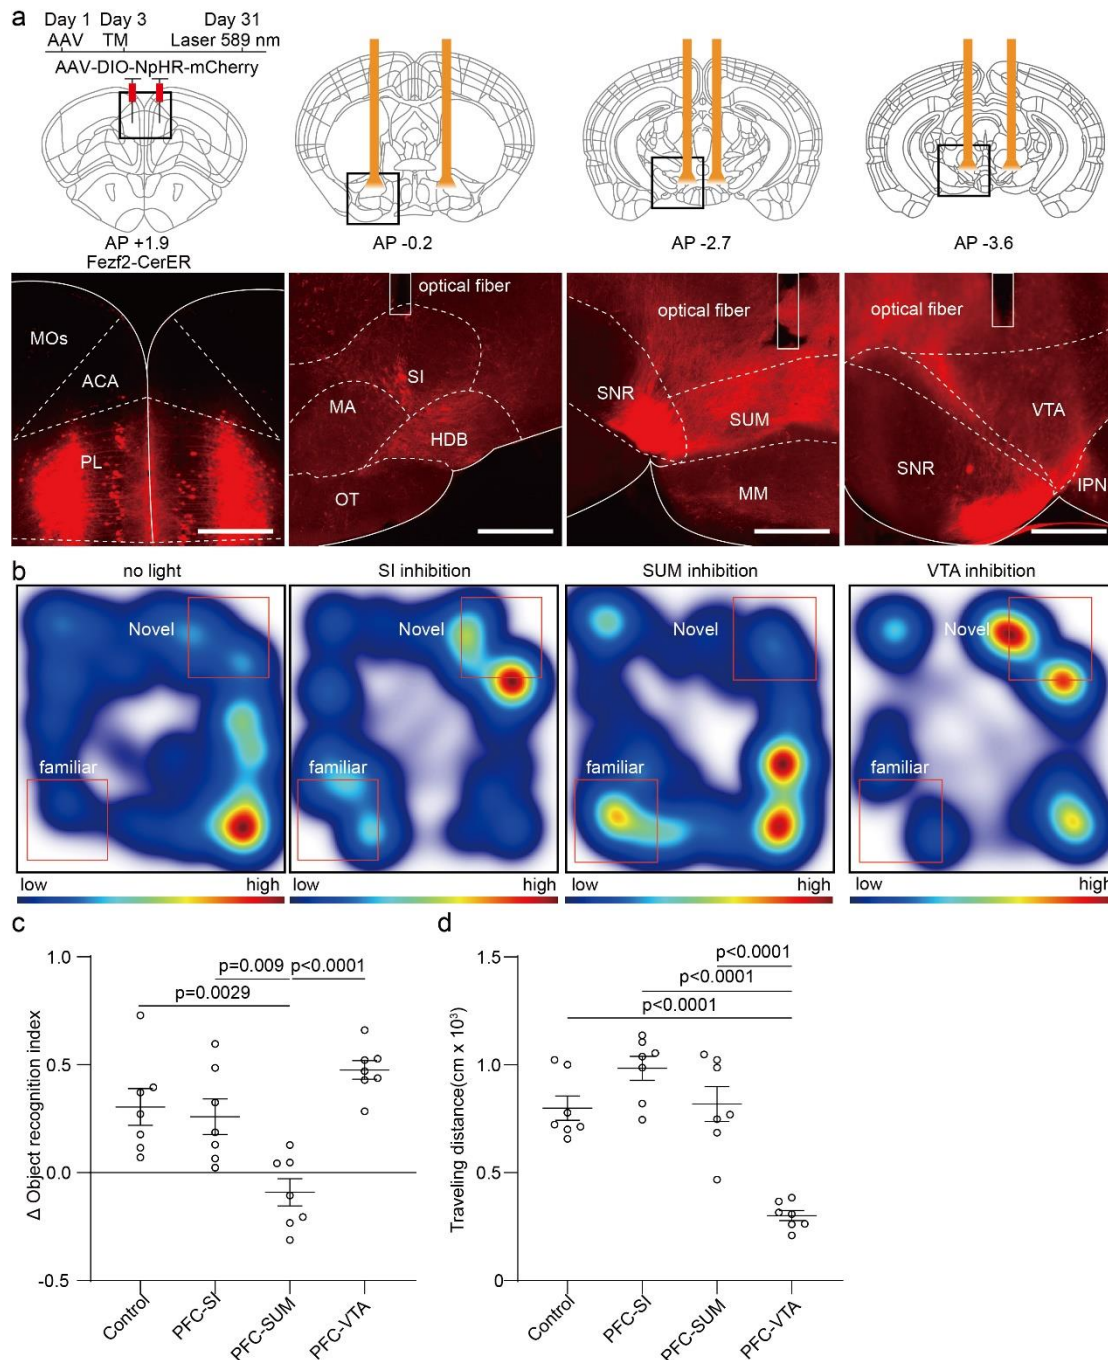

162

163 Supplementary figure 10 Inhibition of specific axon terminals of extratelencephalic projection  
 164 neurons in the mPFC of Fezf2-CreER mice disrupted the object recognition memory, related to  
 165 Fig 3. a. The experimental strategy of terminal inhibition of extratelencephalic projection  
 166 neurons in the mPFC. The Cre dependent AAV expressing NpHR was injected into the mPFC  
 167 of Fezf2-CreER mice. The optical fibers were implanted in SI, SUM or VTA bilaterally to  
 168 inhibit the axon terminals in these brain areas. Three days after the virus injection, tamoxifen  
 169 (200 mg/kg) was injected intraperitoneally to activate the expression of NpHR. 3-4 weeks  
 170 after the virus injection, the behavior tests were performed. The virus injection site and the  
 171 positions of the optical fiber were shown below. b. Heat-map plots showed object recognition  
 172 memory measures from the object recognition test under different experimental conditions (no light



---

173 stimulation; inhibition of axon terminals in SI; inhibition of axon terminals in SUM; inhibition  
174 of axon terminals in VTA.) Red = more time, blue = less time. c. Statistical plots showed the  
175 delta object recognition index under different conditions. One-way repeated-measures (RM)  
176 ANOVA with Tukey's post hoc test, PFC-SUM vs PFC-VTA,  $p= 0.00004$ .  $n = 7$  animals. d.  
177 Statistical plots showed the traveling distance during the test session under different conditions.  
178  $n = 7$  animals. One-way repeated-measures (RM) ANOVA with Tukey's post hoc test, control  
179 vs PFC-VTA,  $p= 0.000015$ ; PFC-SI vs PFC-VTA,  $p= 0.00000008043$ ; PFC-SUM vs PFC-VTA,  
180  $p= 0.00000835702$ . Scale bars in a is  $500 \mu\text{m}$ . MOs, secondary motor area; ACA, anterior  
181 cingulate area; PL, prelimbic area; SI, substantia innominata; MA, magnocellular nucleus;  
182 HDB, horizontal diagonal band; OT, olfactory tubercle; SNR, substantia nigra, reticular part;  
183 SUM, supramammillary nucleus; MM, medial mammillary nucleus; VTA, ventral tegmental  
184 area; IPN, interpeduncular nucleus. All data are listed as the Mean  $\pm$  SEM.  
185

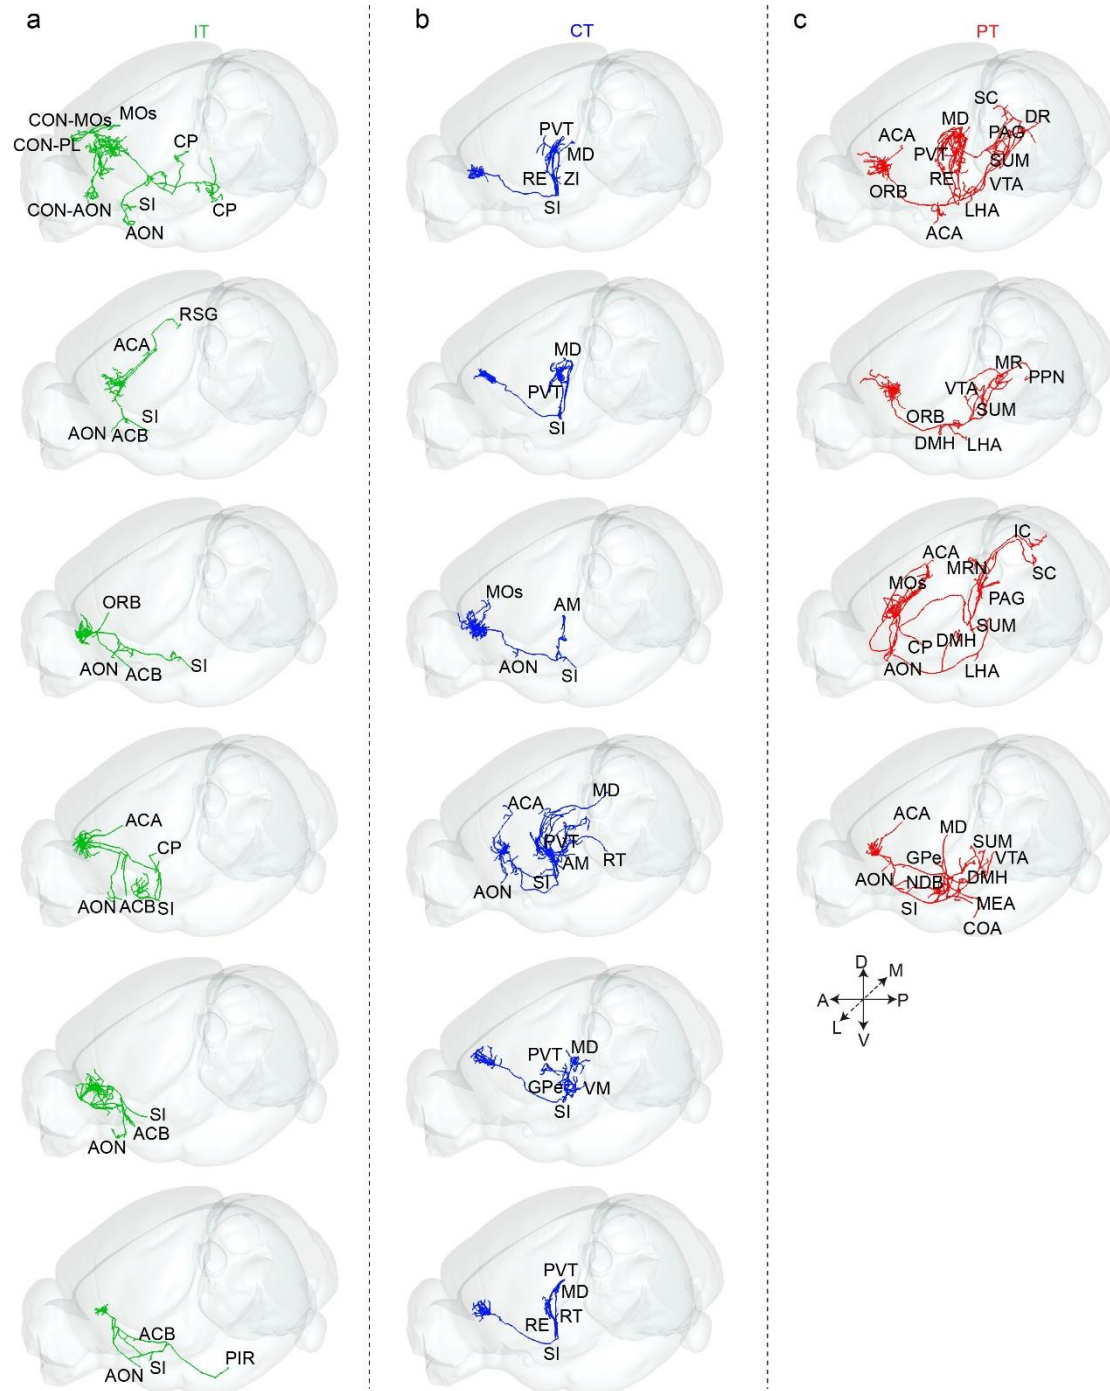

186

187 Supplementary figure 11 The morphology of three types of reconstructed extratelencephalic  
 188 projection neurons in the mPFC, related to Fig 4. a-c. The CT neurons were shown in blue. The  
 189 IT neurons were shown in green. The PT neurons were shown in red. MOs, secondary motor  
 190 area; AON, anterior olfactory nucleus; CP, caudate putamen; SI, substantia innominata. ACB,  
 191 nucleus accumbens; ACA, anterior cingulate area; RSG, retrosplenial granular cortex; ORB,  
 192 orbital cortex; PIR, piriform cortex; PVT, paraventricular thalamic nucleus; MD, mediodorsal  
 193 thalamic nucleus; RT, reticular thalamic nucleus; RE, reuniens thalamic nucleus; VM,  
 194 ventromedial thalamic nucleus; GPe, globus pallidus, external part; AM, anteromedial thalamic  
 195 nucleus; LHA, lateral hypothalamic area; VTA, ventral tegmental area; SUM, supramammillary

---

196 nucleus; PAG, periaqueductal gray; DR, dorsal raphe nucleus; SC, superior colliculus; MR,  
197 median raphe nucleus; IC, inferior colliculus; PPN, pedunculopontine tegmental nucleus; DMH,  
198 dorsomedial hypothalamic nucleus; MEA, medial amygdala; COA, cortical amygdala area;  
199 NDB, diagonal band; MRN, midbrain reticular nucleus. A, anterior; D, dorsal; L, lateral; M,  
200 medial; P, posterior; V, ventral.  
201

202  
203

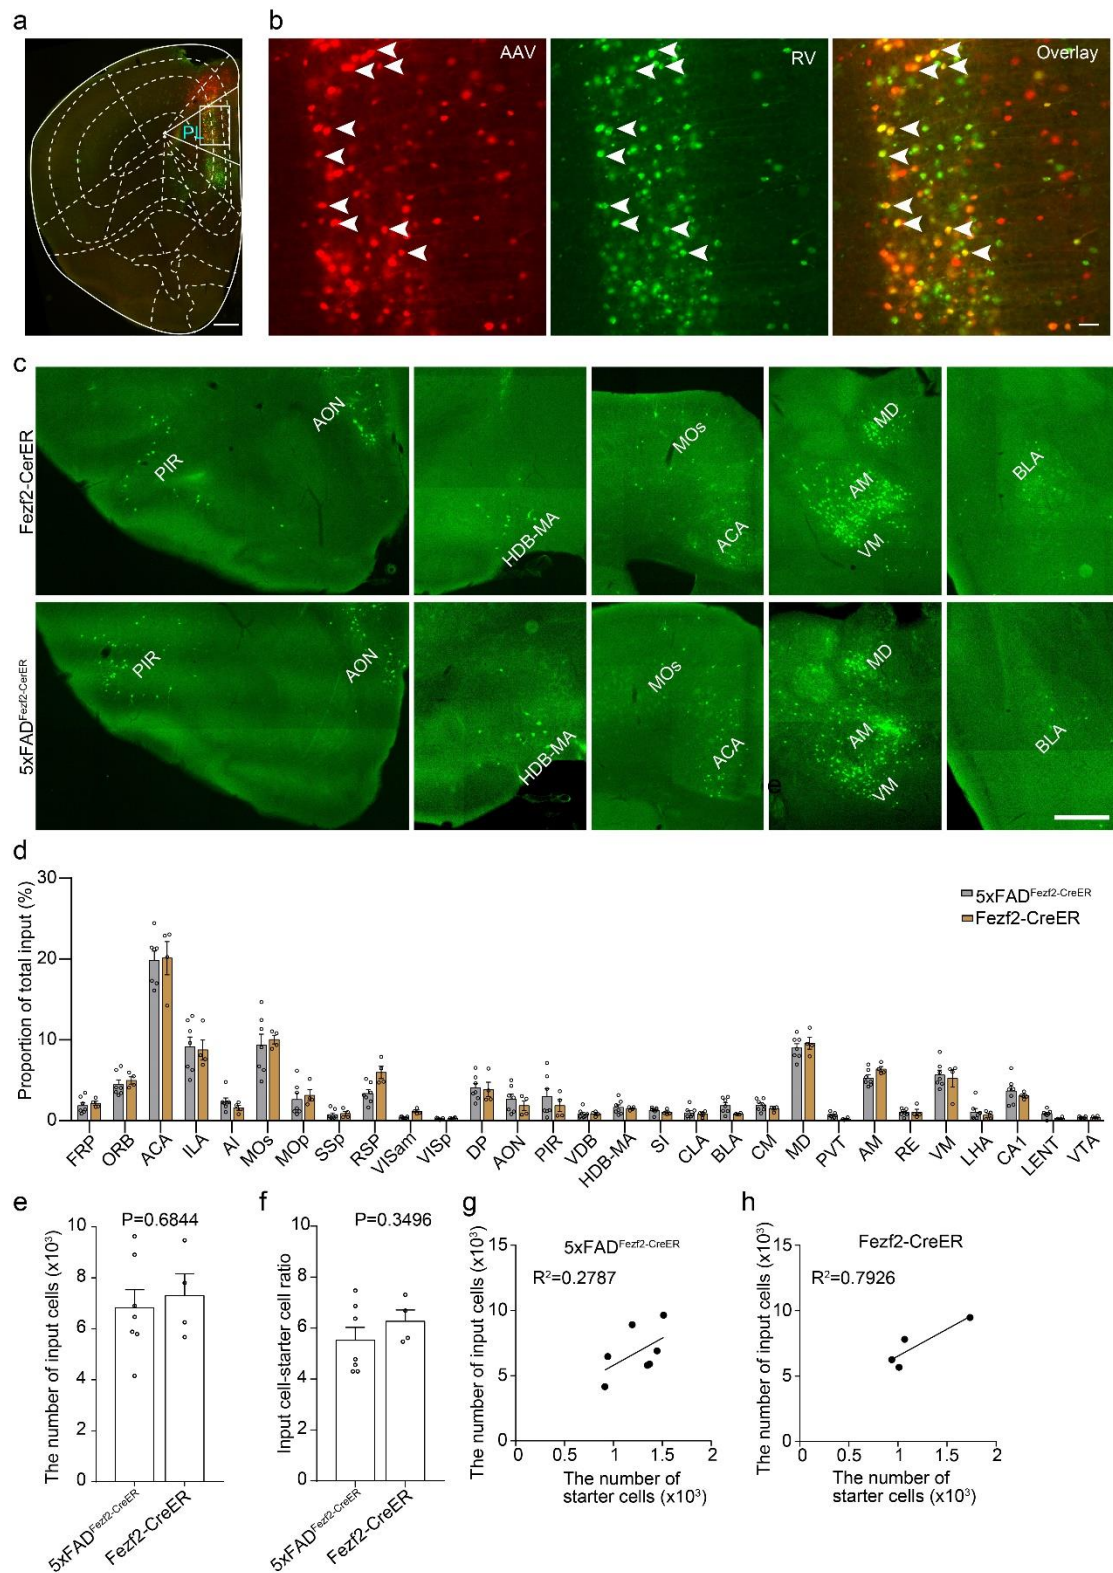

204

205 Supplementary figure 12 The whole brain input to extratelencephalic projection neurons in the  
 206 mPFC of Fezf2-CreER mice and 5×FAD mice at 2 months of age, related to Fig 5. a, b.  
 207 Representative injection sites showed there was strong helper (red) and rabies (green) virus

---

208 expression in the PL. Scale bar: a, 1 mm; b, 100  $\mu$ m. c. Afferent neurons in different brain areas  
209 that established synapses on ET neurons in the mPFC. Scale bar is 1 mm. d. Proportion of whole  
210 brain long range inputs to ET neurons in the prefrontal cortex. AD, n=7 animals; WT, n=4  
211 animals. e. Quantification of the total number of the whole brain afferent neurons. AD, n=7  
212 animals; WT, n=4 animals. Two-tailed unpaired t test. f. The input neuron-starter cell ratio in  
213 both WT group and the AD group, AD, n=7 animals; WT, n=4 animals. Two-tailed unpaired t  
214 test. g, h. The correlation between the number of input neurons and the starter cells in both WT  
215 group and the AD group. PL, prelimbic area; PIR, piriform cortex; AON, anterior  
216 olfactory nucleus; HDB, horizontal diagonal band; MA, magnocellular nucleus; MOs,  
217 secondary motor area; ACA, anterior cingulate area; MD, mediodorsal thalamic nucleus;  
218 AM, anteromedial thalamic nucleus; VM, ventromedial thalamic nucleus; BLA,  
219 basolateral amygdala; FRP, frontal association cortex; ORB, orbital cortex; ILA,  
220 infralimbic area; AI, agranular insular cortex; MOp, primary motor area; SSp, primary  
221 somatosensory area; RSP, retrosplenial granular cortex; VISam, anteromedial visual  
222 area; VISp, primary visual area; DP, dorsal peduncular cortex; VDB, vertical diagonal  
223 band; SI, substantia innominata; CLA, claustrum; CM, central medial thalamic nucleus;  
224 PVT, paraventricular thalamic nucleus; RE, reuniens thalamic nucleus; LHA, lateral  
225 hypothalamic area; LENT, lateral entorhinal cortex; VTA, ventral tegmental area. All  
226 data are listed as the Mean  $\pm$  SEM.  
227

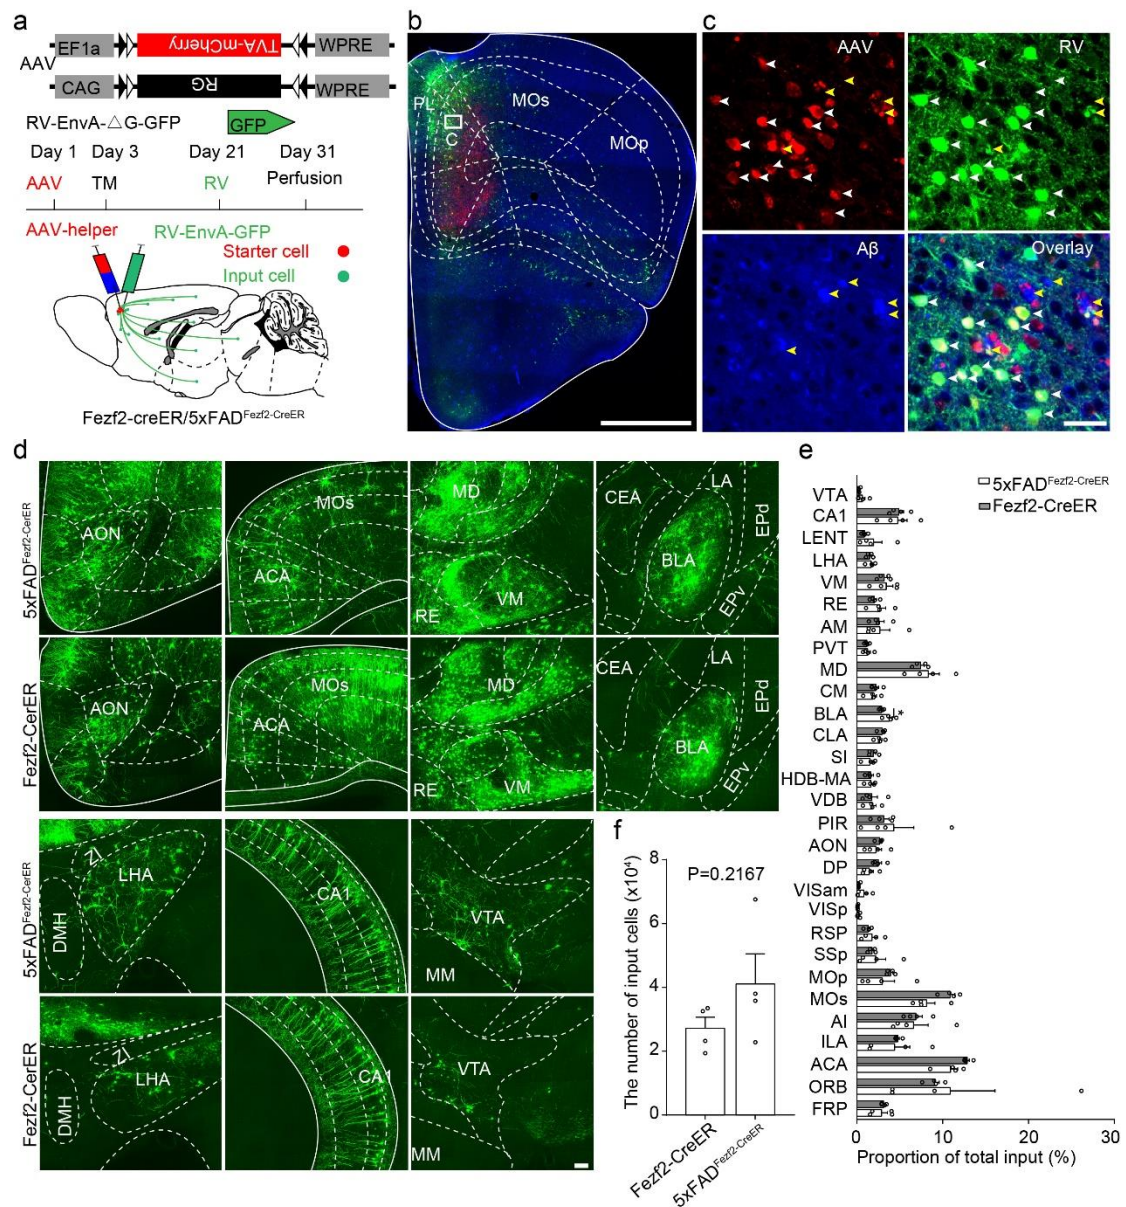

229

230 Supplementary figure 13 The whole brain input to extratelencephalic projection neurons in the  
 231 mPFC of Fezf2-CreER mice and 5×FAD mice at 6 months of age, related to Fig 5. a. AAV  
 232 helper viruses (AAV-EF1a-DIO-TVA-mCherry and AAV-CAG-DIO-RG) was injected into the  
 233 PL of AD<sub>Fezf2-CreER</sub> or Fezf2-CreER mice at 5 months of age and the Cre recombination was  
 234 induced with tamoxifen (200 mg/kg) three days after the virus injection. The injection of RV-  
 235 EnvA-ΔG-GFP was performed 3 weeks after AAV injection. b. Representative injection sites  
 236 showed there was strong helper (red) and rabies (green) virus expression in the PL. Scale bar:  
 237 500 μm. c. Enlarged image boxed in b illustrated some starter neurons and input neurons at the  
 238 injection site. Scale bar: 50 μm. d. Whole brain datasets acquired by fMOST illustrated neurons  
 239 in different brain areas that established synapses on ET neurons in the mPFC. Scale bar: 50 μm.  
 240 e. Proportion of whole brain long range inputs to ET neurons in the prefrontal cortex. f. The  
 241 total number of input neurons in both AD<sub>Fezf2-CreER</sub> group and Fezf2-CreER group. two-tailed  
 242 unpaired t test, n = 4 animals for each group. For abbreviation, please see Supplementary figure

---

243 12. CEA, central amygdala; DMH, dorsomedial hypothalamic nucleus. All data are listed as the  
244 Mean  $\pm$  SEM.  
245

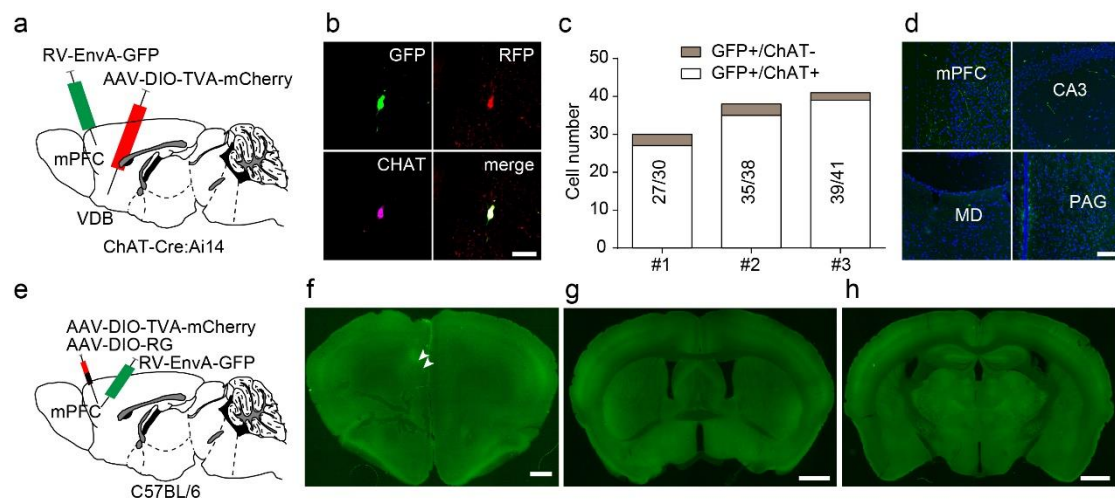

247

248 Supplementary figure 14 The specificity of helper virus for RV tracing, related to Fig5. a. AAV-  
 249 DIO-TVA-mCherry was injected into the VDB of ChAT-Cre mice and the rabies virus coated  
 250 with EnvA was injected into the mPFC to label the cholinergic neurons in the VDB that project  
 251 to mPFC. b. Immunofluorescence staining against choline acetyltransferase to validate the  
 252 specificity of the helper virus. c. Quantification analysis of the GFP labeled neurons that are  
 253 cholinergic. d. The collateral projections of the cholinergic neurons in the VDB that project to  
 254 mPFC. e. The Cre dependent helper virus that express TVA and RG was injected into the mPFC  
 255 of C57BL/6 mice brain to test the specificity of helper virus. RV was injected into the same site  
 256 three weeks after the AAV injection. f. The RV labeled neurons at the injection site. g, h. No  
 257 long-range input neuron was labeled in C57BL/6 mice brain. mPFC, medial prefrontal cortex;  
 258 MD, mediodorsal thalamic nucleus; PAG, periaqueductal gray. Scale bars in b and d are 50  $\mu$ m.  
 259 Scale bars in f, g and h are 1 mm.

260



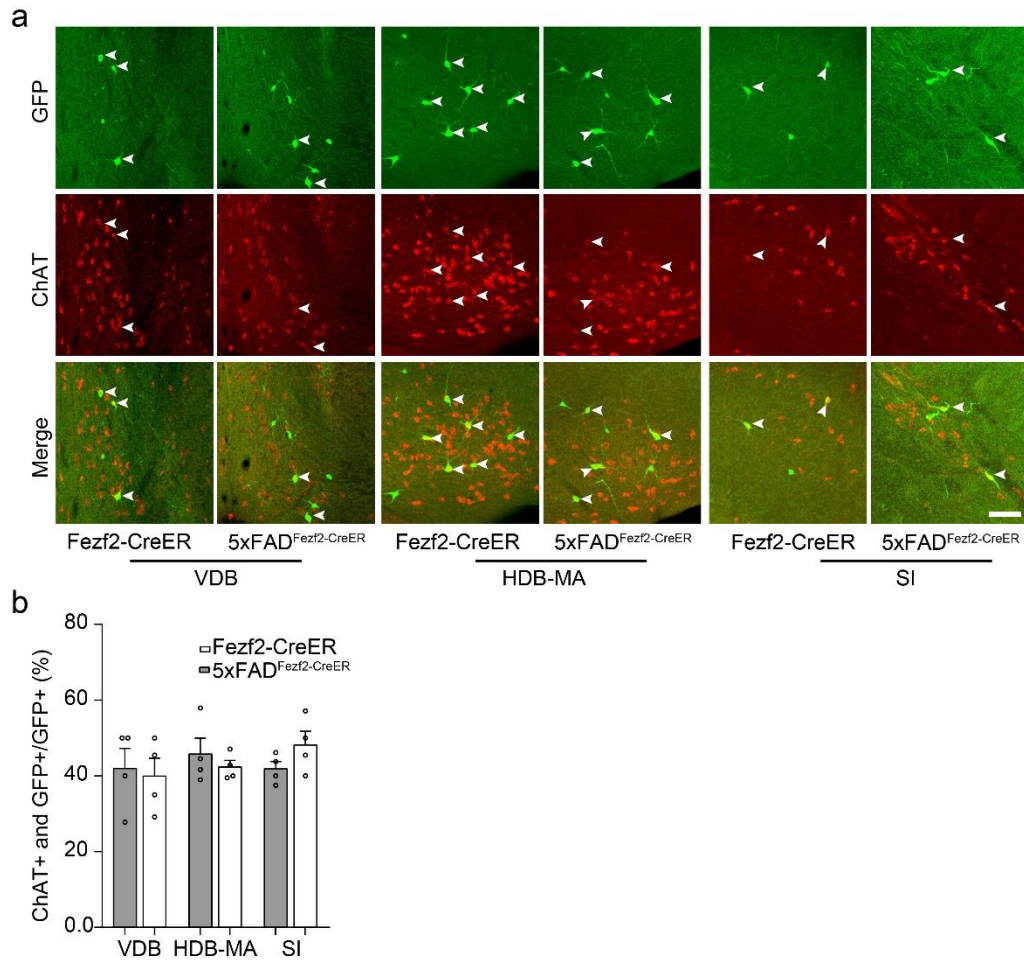

261

262 Supplementary figure 15 Cholinergic inputs from basal forebrain to extratelencephalic  
 263 projection neurons in the mPFC of 5×FAD mice at 2 months of age. a. Immunostaining against  
 264 ChAT (red) to validate that some of the rabies labeled input neurons (green) from VDB, HDB-  
 265 MA and SI to extratelencephalic projection neurons in the mPFC are cholinergic neurons. Scale  
 266 bar: 50 μm. b. Comparison of ChAT positive RV labeled neurons between AD<sub>Fezf2-CreER</sub> and  
 267 Fezf2-CreER mice in VDB, HDB-MA and SI brain area (n = 4 for AD, n = 4 for WT). VDB,  
 268 vertical diagonal band; HDB, horizontal diagonal band; MA, magnocellular nucleus; SI,  
 269 substantia innominata. All error bars represent Mean ± SEM.

270

271

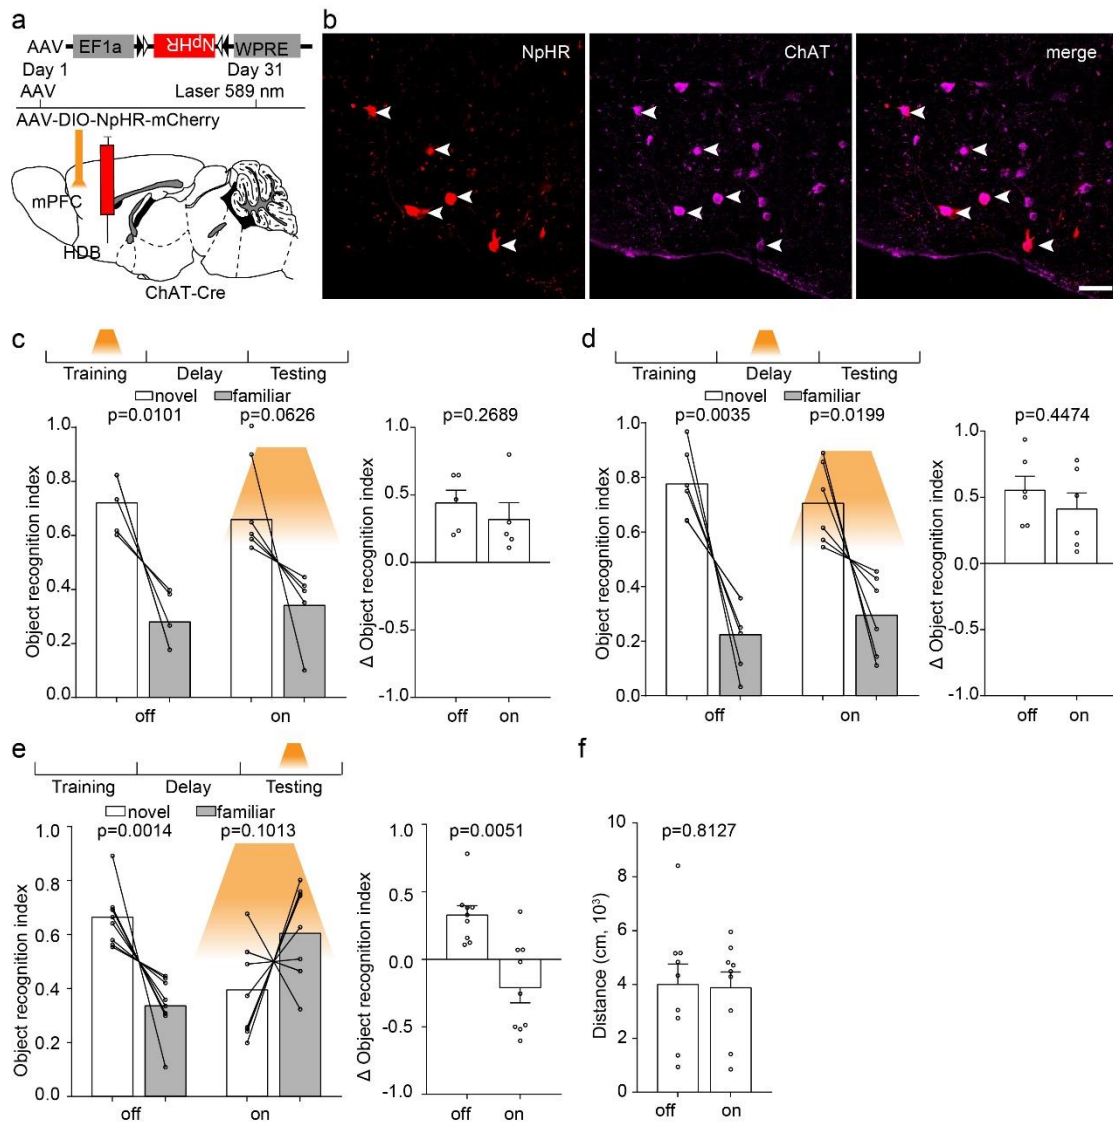

272

273 Supplementary figure 16 Inhibition of cholinergic terminals in the mPFC of ChAT-Cre mice in  
 274 specific phase disrupted object recognition memory, related to Fig 7. a. The experimental  
 275 strategy of inhibition of cholinergic terminals in the mPFC. The Cre dependent AAV expressing  
 276 NpHR was injected into the HDB of ChAT-Cre mice. 3-4 weeks after the virus injection, the  
 277 behavior tests were performed. b. Immunostaining against ChAT to validate the specificity of  
 278 AAV expression. c. Statistical plots showed that the ChAT-Cre mice tended to explore the novel  
 279 object under two conditions (with or without light stimulation during training session). The  
 280 delta object cognition index showed no difference under two conditions. two-tailed paired t test,  
 281  $n = 5$  animals. d. Statistical plots showed that the ChAT-Cre mice tended to explore the novel  
 282 object under two conditions (with or without light stimulation during delay session). The delta  
 283 object cognition index showed no difference under two conditions. two-tailed paired t test,  $n =$   
 284  $6$  animals. e. Statistical plots showed that during the test session, the ChAT-Cre mice that  
 285 received light stimulation significantly spent less time exploring the novel object compared to  
 286 the sessions without light stimulation at 6 months of age. The animals which received light  
 287 stimulation during test session showed decreased delta object recognition index, two-tailed  
 288 paired t test,  $n = 9$  animals. f. The statistical plot showed the traveling distance of ChAT-Cre

---

289 mice with or without light inhibition of the cholinergic terminals in mPFC. two-tailed paired t  
290 test, n = 9 animals. Scale bar in b is 50  $\mu$ m. All data are listed as the Mean  $\pm$  SEM.  
291

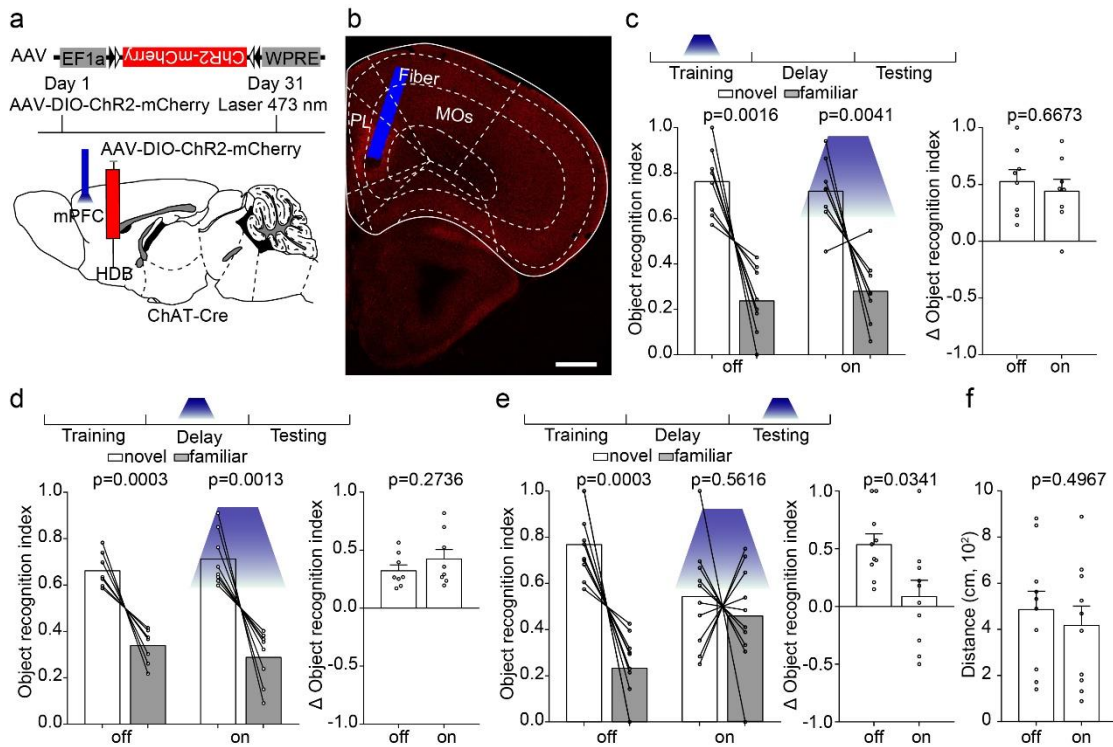

293

294 Supplementary figure 17 Activation of cholinergic terminals in the mPFC of ChAT-Cre mice in  
 295 specific phase disrupted object recognition memory, related to Fig 7. a. The experimental  
 296 strategy of activation of cholinergic terminals in the mPFC. The Cre dependent AAV expressing  
 297 ChR2 was injected into the HDB of ChAT-Cre mice. 3-4 weeks after the virus injection, the  
 298 behavior tests were performed. b. One example image showed the optical fiber position in the  
 299 mPFC. c. Statistical plots showed that the ChAT-Cre mice tended to explore the novel object  
 300 under two conditions (with or without light stimulation during training session). The delta  
 301 object cognition index showed no difference under two conditions. two-tailed paired t test, n =  
 302 8 animals. d. Statistical plots showed that the ChAT-Cre mice tended to explore the novel object  
 303 under two conditions (with or without light stimulation during delay session). The delta object  
 304 cognition index showed no difference under two conditions. two-tailed paired t test, n = 8  
 305 animals. e. Statistical plots showed that during the test session, the ChAT-Cre mice that received  
 306 light stimulation significantly spent less time exploring the novel object compared to the  
 307 sessions without light stimulation at 6 months of age. The animals which received light  
 308 stimulation during test session showed decreased delta object recognition index, two-tailed  
 309 paired t test, n = 10 animals. f. The statistical plot showed the traveling distance of ChAT-Cre  
 310 mice with or without light activation of the cholinergic terminals in mPFC. two-tailed paired t  
 311 test, n=10 animals. Scale bar in b is 500 μm. PL, prelimbic area; MOs, secondary motor area.  
 312 All data are listed as the Mean ± SEM.

313

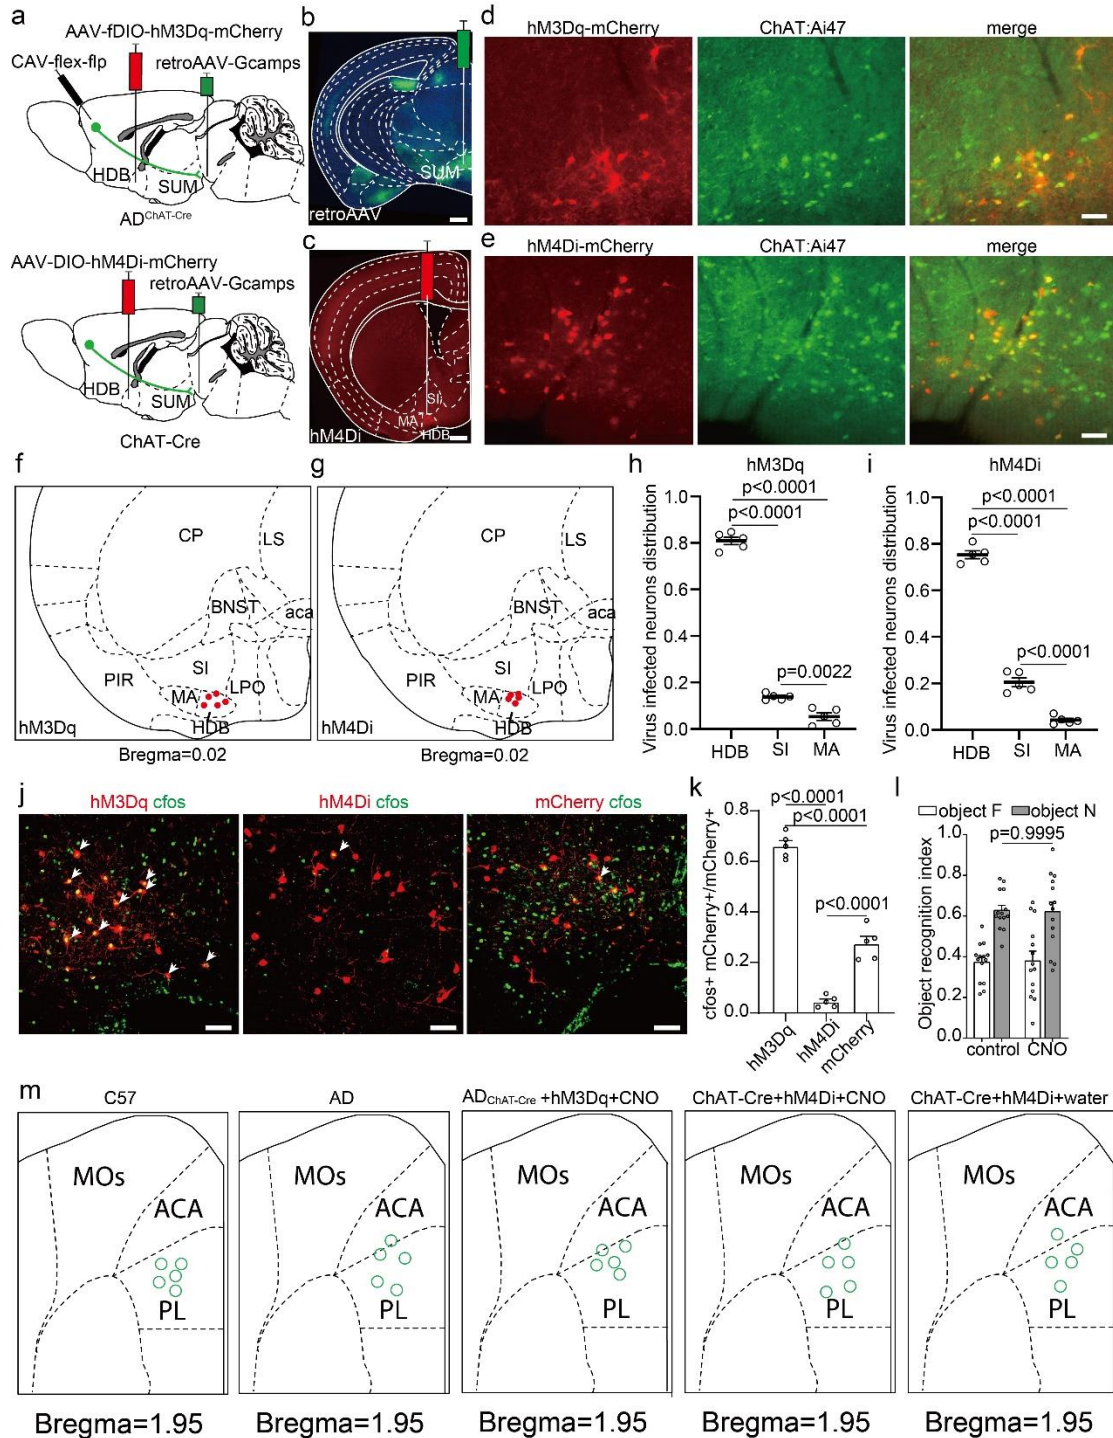

314

315 Supplementary figure 18 The specificity and functional validation of AAV expressing hM3Dq  
 316 and hM4Di, related to Fig 8. a. The experimental strategy to activate or inhibit the mPFC  
 317 projection cholinergic neurons and to record the activity of SUM projection neurons in the  
 318 mPFC. For the hM3Dq activation, the flp dependent AAV virus expressing hM3Dq was injected  
 319 into the HDB of AD<sup>ChAT-Cre</sup> mice. Cre dependent CAV expressing flp was injected into the mPFC.  
 320 The retroAAV expressing GCAMP6s was injected into the SUM to label the SUM projection  
 321 neurons in mPFC for fiber photometry. For the Hm4Di inhibition, the Cre dependent AAV  
 322 expressing hM4Di was injected into the HDB of ChAT-Cre mice. The retroAAV expressing

---

323 GCAMp6s was injected into the SUM to label the SUM projection neurons in mPFC for fiber  
324 photometry. b. The image showed the retroAAV injection site in the SUM. c. The image showed  
325 the virus injection site at the HDB. d. The validation of the specificity of the AAV that express  
326 hM3Dq and mCherry. The fluorescence of mCherry was highly colocalized with the  
327 endogenous expressed GFP. e. The validation of the specificity of the AAV that express hM4Di  
328 and mCherry. The fluorescence of mCherry was highly colocalized with the endogenous  
329 expressed GFP. f, g. The diagrams showed the injection site of different animals in the HDB. h,  
330 i. Quantification of the virus infected neurons around the injection site. n = 5 animals for each  
331 group. one-way repeated-measures (RM) ANOVA with Tukey's post hoc test. h. HDB vs SI,  
332  $p=6.6\times 10^{-13}$ ; HDB vs MA,  $p=2.8\times 10^{-13}$ . i. HDB vs SI,  $p=1.95\times 10^{-11}$ ; HDB vs MA,  $p=1.09\times 10^{-12}$ ;  
333 SI vs MA,  $p=0.000022$ . j. Example images showed the colocalization of c-fos and mCherry  
334 in hM3Dq group, hM4Di group and control group after object interaction. k. Statistical plot  
335 showed the percentage of colocalization of c-fos and mCherry in hM3Dq group, hM4Di group  
336 and control group after object interaction. one-way repeated-measures (RM) ANOVA with  
337 Tukey's post hoc test, hM3Dq vs. hM4Di,  $p=3.7\times 10^{-10}$ ; hM3Dq vs. mCherry,  $p=7.08\times 10^{-8}$ ,  
338 hM4Di vs. mCherry,  $p=0.000018$ . n = 5 animals for each group. l. Comparison of the effect of  
339 chronic administration of CNO alone on object recognition memory. One-way ANOVA  
340 followed with Tukey's post hoc test, control group, n=14 animals; CNO group, n=14 animals.  
341 m. Schematics showing the placement of optic fibers of fiber photometry experiments in Fig.  
342 8. HDB, horizontal diagonal band; SUM, supramammillary nucleus; MA, magnocellular  
343 nucleus; SI, substantia innominata. CP, caudate putamen; LS, lateral septum; aca, anterior  
344 commissure, anterior part; BNST, bed nucleus of the stria terminalis; LPO, lateral preoptic area;  
345 PIR, piriform cortex; MOs, secondary motor area; ACA, anterior cingulate area; PL, prelimbic  
346 area. Scale bars in b and c are 500  $\mu\text{m}$ . Scale bars in d, e and j are 50  $\mu\text{m}$ . All data are listed as  
347 the Mean  $\pm$  SEM.  
348

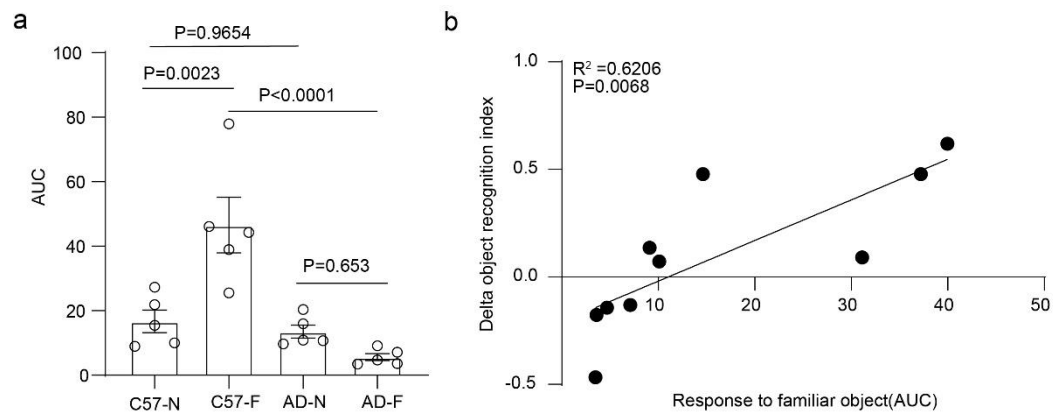

350

351 Supplementary fig. 19 The relationship between the object recognition and neuron response to  
 352 familiar object. a. The ET neuron response in the mPFC of AD animals to familiar but not novel  
 353 object was decreased compared to that of wild type animals. (one-way ANOVA followed by  
 354 Tukey correction, C57-F vs AD-F,  $p=0.0000919$ . N, novel; F, familiar.).  $n=5$  animals in each  
 355 group. b. The correlation between the ET neuron response in the mPFC to familiar object and  
 356 the delta object recognition index. (AD,  $n=5$  animals, wild type,  $n=5$  animals). Linear  
 357 regression analysis. All data are listed as the Mean  $\pm$  SEM.

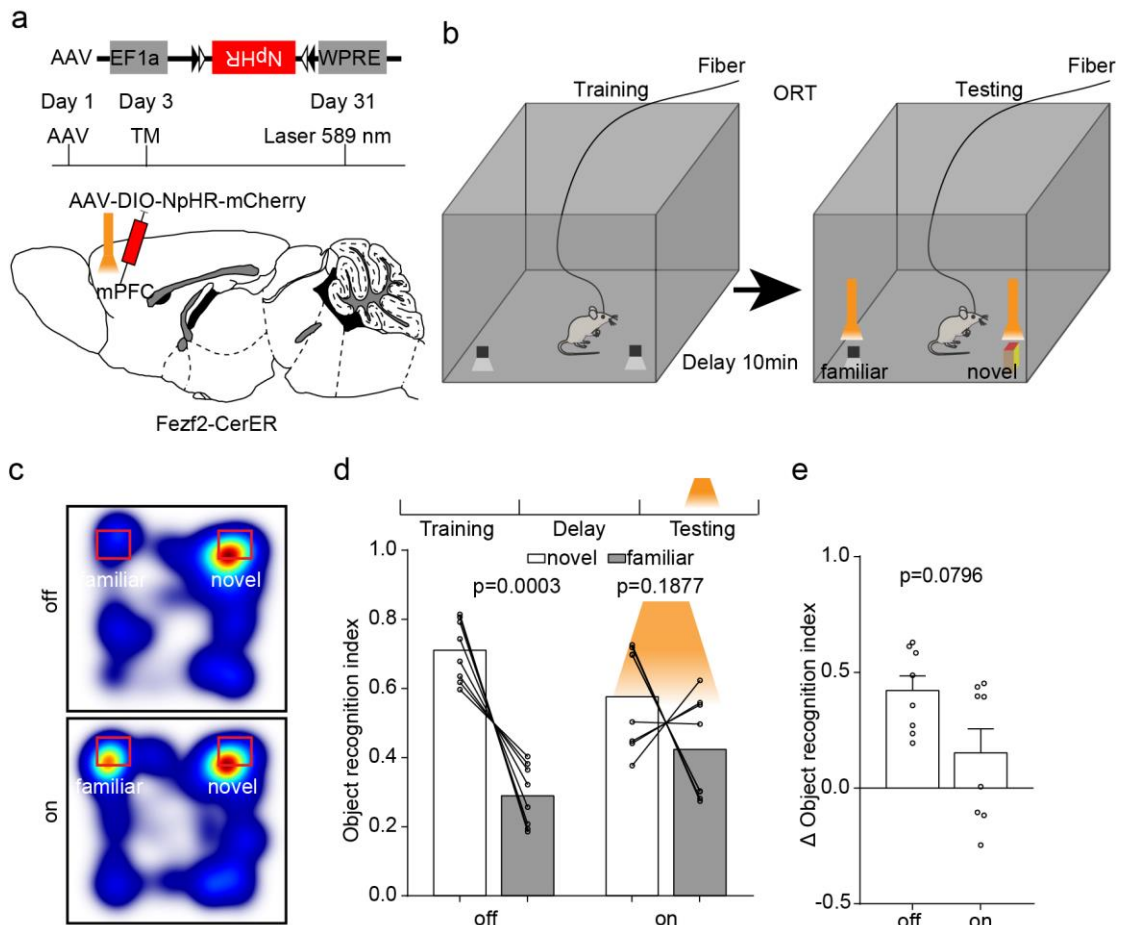

359

360 Supplementary figure 20 The effect of region-specific inhibition of extratelencephalic  
 361 projection neurons in the mPFC during object recognition test. a and b. The experimental  
 362 procedure to inhibit the extratelencephalic projection neurons in the mPFC and the object  
 363 recognition test. c. Heat-map plots showed object recognition memory measures from the object  
 364 recognition test. Red = more time, blue = less time. (upper, without light inhibition; lower, the  
 365 light inhibition was delivered when animal entered the regions where the objects were located  
 366 at). d, e. Quantification of the object recognition index and the delta object recognition index  
 367 of the tests with or without light inhibition. n=8 animals, two-tailed paired t test was used. All  
 368 data are listed as the Mean ± SEM.

369



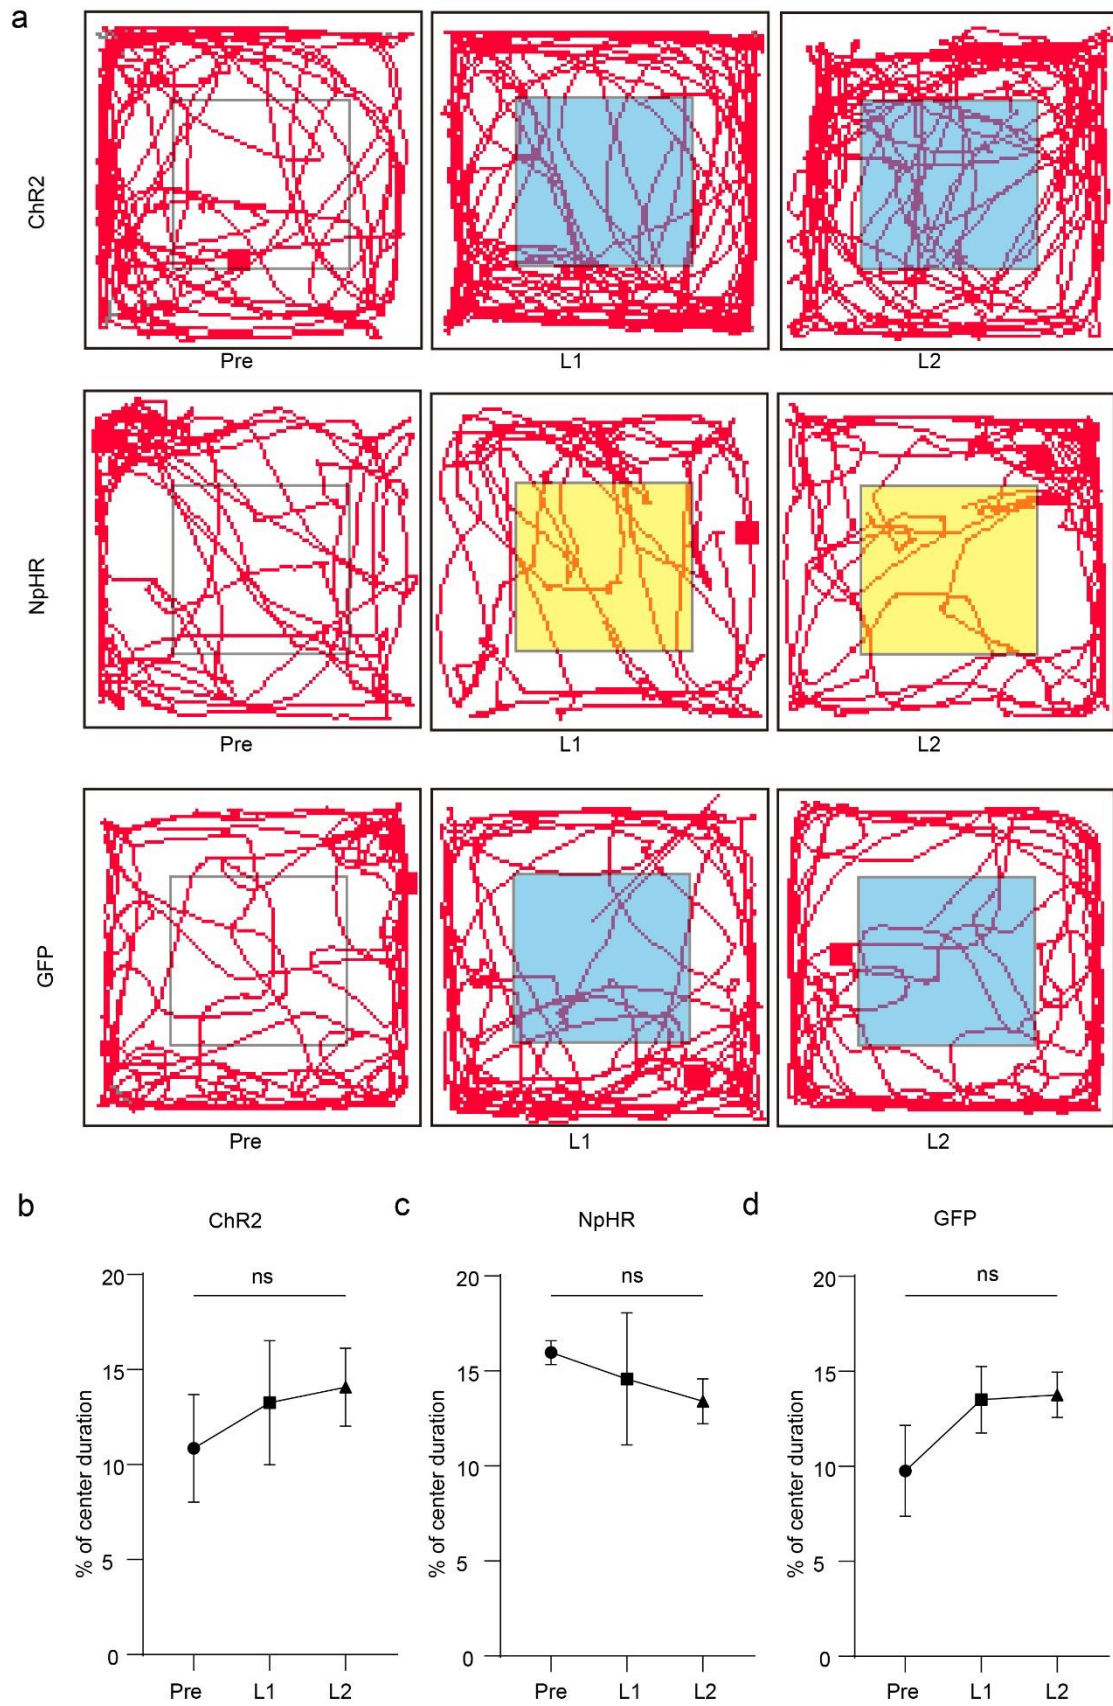

370

371 Supplementary figure 21 Optogenetic manipulation of extratelencephalic projection (ET)  
 372 neurons in the mPFC did not induce robust conditional place preference or aversion. a.

---

373 Representative iClass tracks recorded during the iClass test paired with blue light activation or  
374 yellow light inhibition in the center of the arena. b. Statistical plot showed that activation of ET  
375 neurons in the mPFC during iClass test did not alter the proportion of time that the test mice  
376 spent in the center of the area. n = 6 animals. c. Statistical plot showed that inhibition of ET  
377 neurons in the mPFC during iClass test did not alter the proportion of time that the test mice  
378 spent in the center of the area. n = 5 animals. d. Statistical plot showed that light stimulation of  
379 ET neurons in the mPFC that expressed GFP did not alter the proportion of time that the test  
380 mice spent in the center of the area. n = 6 animals. one-way repeated-measures (RM) ANOVA  
381 with Tukey's post hoc test, all data are listed as the Mean  $\pm$  SEM.  
382

---

383 **Supplementary table 1** Probe sequences used for Cre FISH (Highlighted in red).

384 Cre:

385 ATGTCCAATTTACTGACCGTACACCAAAATTTGCCTGCATTACCGGTCG  
386 ATGCAACGAGTGATGAGGTTTCGCAAG<sup>2</sup>AACCTGATGGACATGTTTCAGGGAT  
387 CGCCAGGCGTTTTCTGAGCATACTGGAAAATGCTTCTGTCCGTTTGCCGG  
388 TCGTGGGCGGCATGGTGAAGTTGAATAACCGGAAATGGTTTCCC GCAGA  
389 ACCTGAAGATGTTTCGCGA<sup>4</sup>TTATCTTCTATATCTTCAGGCGCGCGGTCTGGC  
390 AGTAAAACTATCCAGCAACATTTGGGCCAGCTAAACATGCTTCATCGTCG  
391 GTCCGGGCTGCCACGACCAAGTGACAGCAATGCTGTTTCACTGGTTATGCG  
392 GCGGATCCGAAAAGAAAACGTTGATGCCGGTGAACGTGAAAACAGGCTC  
393 TAGCGTTCGA<sup>1</sup>ACGCACTGATTTTCGACCAGGTTTCGTTCACTCATGGAAAATA  
394 GCGATCGCTGCCAGGATATACGTAATCTGGCATTCTGGGGATTGC<sup>6</sup>TTATAA  
395 CACCCTGTTACGTATAGCCGAAATTGCCAGGATCAGGGTTAAAGATATCTCA  
396 CGTACTGACGGTGGGAGAATGTTAATCCATATTGGCAGAACGAAAACGCTG  
397 GTTAGCACCGCAGGTGTAGAG<sup>3</sup>AAGGCACTTAGCCTGGGGGTAAC TAAACT  
398 GGTCGAGCGATGGATTTCCGTCTCTGGTGTAGCTGATGATCCG<sup>5</sup>AATAACTA  
399 CCTGTTTTGCCGGGTCAGAAAAAATGGTGTGCGCGCCATCTGCCACCAG  
400 CCAGCTATCAACTCGCGCCCTGGAAGGGATTTTTGAAGCAACTCATCGATT  
401 GATTTACGGCGCTAAGGATGACTCTGGTCAGAGATACCTGGCCTGGTCTGG  
402 ACACAGTGCCCGTGTCTGGAGCCGCGCGAGATATGGCCCGCGCTGGAGTTT  
403 CAATACCGGAGATCATGCAAGCTGGTGGCTGGACCAATGTAAATATTGTCAT  
404 GAACTATATCCGTAACCTGGATAGTGAAACAGGGGCAATGGTGC GCCTGCT  
405 GGAAGATGGCGATTAG

406

407
